# Supplementary material for: Dual-emissive 2-(2′-hydroxyphenyl)oxazoles for high performance organic electroluminescent devices: discovery of a new equilibrium of excited state intramolecular proton transfer with a reverse intersystem crossing process
Source: Chem Sci. 2017 Dec 1;9(5):1213–20. doi: 10.1039/c7sc04464j (PMC5885805; doi:10.1039/c7sc04464j)

## ***Supporting Information***

### **Dual-emissive 2-(2'-Hydroxyphenyl)oxazoles for high performance organic electroluminescent devices: discovery of a new equilibrium of excited state intramolecular proton transfer with a reverse intersystem crossing process**

Bijin Li,<sup>‡a</sup> Linsen Zhou,<sup>‡c</sup> Hu Cheng,<sup>a</sup> Quan Huang,<sup>a</sup> Jingbo Lan,<sup>\*a</sup> Liang Zhou,<sup>\*b</sup> and Jingsong You<sup>\*a</sup>

*<sup>a</sup>Key Laboratory of Green Chemistry and Technology of Ministry of Education, College of Chemistry, Sichuan University, 29 Wangjiang Road, Chengdu 610064, PR China*

*E-mail address: jsyou@scu.edu.cn; jingbolan@scu.edu.cn*

*<sup>b</sup>State Key Laboratory of Rare Earth Resource Utilization, Changchun Institute of Applied Chemistry, Chinese Academy of Sciences, 5625 Renmin Street, Changchun 130022, PR China*

*E-mail: zhoul@ciac.ac.cn.*

*<sup>c</sup>Center of Interface Dynamics for Sustainability, Institute of Materials, China Academy of Engineering Physics, 596 Yinhe Road, Chengdu 610200, PR China*

*<sup>‡</sup> These authors contributed equally to this work.*

## I. General remarks

NMR spectra were recorded with a Bruker AV II-400 spectrometer. The  $^1\text{H}$  NMR (400 MHz) chemical shifts were measured relative to  $\text{CDCl}_3$  or  $\text{DMSO-}d_6$  as the internal reference ( $\text{DMSO-}d_6$ :  $\delta$  2.50 ppm;  $\text{CDCl}_3$ :  $\delta$  7.26 ppm). The  $^{13}\text{C}$  NMR (100 MHz) chemical shifts were given using  $\text{DMSO-}d_6/\text{CDCl}_3$  as the internal standard ( $\text{DMSO-}d_6$ :  $\delta$  39.52 ppm;  $\text{CDCl}_3$ :  $\delta$  77.16 ppm). High resolution mass spectra (HR-MS) were performed on ESI-TOF. Melting points were recorded with XRC-1 and are uncorrected. UV-vis spectra were recorded using a HITACHI U-2910 spectrometer. Fluorescence spectra and absolute quantum yields were taken using a Horiba Jobin Yvon-Edison Fluoromax-4 fluorescence spectrometer with a calibrated integrating sphere system. The excited state lifetimes were obtained using an HORIBA TEMPRO-01 instrument. Cyclic voltammetry (CV) measurement was performed on LK2010A using an  $\text{Ag}/\text{Ag}^+$  reference electrode, a platinum wire counter electrode, and a platinum plate working electrode. Energy levels were calculated with respect to a standard ferrocene/ferrocenium ( $\text{Fc}/\text{Fc}^+$ ) redox couple. Differential scanning calorimetry (DSC) data was recorded using a TA instrument DSC-Q200 1474. The decomposition temperature corresponding to 5% weight loss was conducted on NETZSCH TG 209F1 Iris.

Unless otherwise noted, chemicals and reagents were purchased from commercial suppliers without further purification. All syntheses and manipulations were performed under  $\text{N}_2$  atmosphere in a glove box or using standard Schlenk. Solvents were dried by refluxing for at least 12 h over  $\text{CaH}_2$  (DMF and DCM), sodium (1,4-dioxane, THF and toluene), magnesium and iodine ( $\text{CH}_3\text{OH}$ ), and freshly distilled and vigorously purged with  $\text{N}_2$  for 1 hour prior to use. *O*-Mesitylsulfonylhydroxylamine was prepared according to the literature procedures.<sup>1</sup> 4,4'-(Phenazine-5,10-diyl)dibenzonitrile (DHPZ-2BN) was synthesized according to the literature procedure.<sup>2</sup>

## II. Device fabrication

Indium–tin–oxide (ITO) coated glass with a sheet resistance of  $10\ \Omega\ \text{sq}^{-1}$  was used as the anode substrate. Prior to film deposition, patterned ITO substrates were cleaned with detergent, rinsed in deionized water, dried in an oven, and finally treated with oxygen plasma for 5 min at a pressure of 10 Pa to enhance the surface work function of ITO anode (from 4.7 to 5.1 eV). All of the organic layers were deposited with the rate of  $0.1\ \text{nm}\ \text{s}^{-1}$  under high vacuum ( $\leq 2 \times 10^{-5}$  Pa). The doped and co-doped layers were prepared by co-evaporating dopant(s) and host material from two or three individual sources, and the doping concentrations were modulated by controlling the evaporation rates of dopant(s).  $\text{MoO}_3$ , LiF, and Al were deposited in another vacuum chamber ( $\leq 8.0 \times 10^{-5}$  Pa) with the rates of 0.01 and  $1\ \text{nm}\ \text{s}^{-1}$ , respectively, without being exposed to the atmosphere. The thicknesses of these deposited layers and the evaporation rate of individual materials were monitored in vacuum with quartz crystal monitors. A shadow mask was used to define the cathode and to make ten devices ( $10\ \text{mm}^2$ ) on each substrate.

Measurements: Current density–voltage–Luminance ( $J$ – $V$ – $L$ ) characteristics were measured by using a programmable Keithley source measurement unit (Keithley 2400 and Keithley 2000) with a silicon photodiode. The EL spectra were measured with a calibrated Hitachi F–7000 fluorescence spectrophotometer. On the basis of the uncorrected EL fluorescence spectra, the Commission Internationale de l’Eclairage (CIE) coordinates were calculated using the test program of Spectrascan PR650 spectrophotometer. The EQE of EL devices were calculated based on the photo energy measured by the photodiode, the EL spectrum, and the current pass through the device.

## III. Synthesis of 2-(2'-hydroxyphenyl)oxazoles

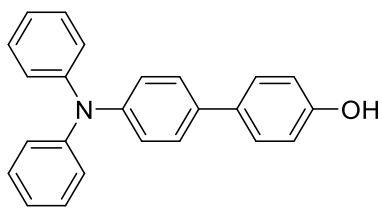

#### 4'-(Diphenylamino)biphenyl-4-ol (**5a**)

Compound **5a** was synthesized according to the literature procedure.<sup>3b</sup> To a dried 100 mL schlenk tube with a magnetic stirring bar were added Pd(OAc)<sub>2</sub> (16.9 mg, 75 μmol), XPhos (71.5 mg, 0.15 mmol), 4-iodophenol (220.0 mg, 1.0 mmol), 4-(diphenylamino)phenylboronic acid (578.0 mg, 2.0 mmol), K<sub>3</sub>PO<sub>4</sub> (636.6 mg, 3.0 mmol) and THF (4.0 mL) under N<sub>2</sub> atmosphere. The reaction mixture was then stirred at 80 °C for 12 h. After being cooled to room temperature, the reaction mixture was diluted with 10-20 mL of EtOAc, filtered through a celite pad, and washed with 10-20 mL of EtOAc. Organic solvent was removed under reduced pressure. The residue was purified by flash column chromatography (petroleum ether/ethyl acetate = 6/1, v/v) to afford the desired product as an off-white solid (320 mg, 95%). M.p.: 132-134 °C; <sup>1</sup>H NMR (400 MHz, DMSO-*d*<sub>6</sub>): δ (ppm) 9.49 (s, 1H), 7.49 (d, *J* = 8.4 Hz, 2H), 7.44 (d, *J* = 8.4 Hz, 2H), 7.31-7.27 (m, 4H), 7.05-7.00 (m, 8H), 6.82 (d, *J* = 8.4 Hz, 2H); <sup>13</sup>C NMR (100 MHz, DMSO-*d*<sub>6</sub>): δ (ppm) 156.8, 147.2, 145.7, 134.7, 130.4, 129.5, 127.3, 126.9, 124.0, 123.7, 122.9, 115.7; HRMS (ESI<sup>+</sup>): calcd for C<sub>24</sub>H<sub>20</sub>NO [M+H]<sup>+</sup> 338.1545, found 338.1549.

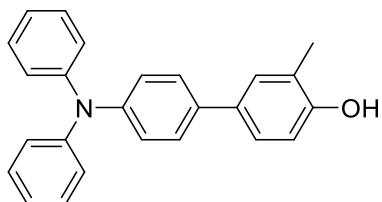

#### 4'-(Diphenylamino)-3-methylbiphenyl-4-ol (**5b**)

Compound **5b** was synthesized according to the literature procedure.<sup>3b</sup> To a reaction tube with a magnetic stirring bar, Pd(OAc)<sub>2</sub> (7.5 mol%, 16.9 mg, 75 μmol), XPhos (15 mol%, 71.5 mg, 0.15 mmol), 4-bromo-2-methylphenol (187.0 mg, 1.0 mmol), 4-(diphenylamino)phenylboronic acid (578.0 mg, 2.0 mmol), K<sub>3</sub>PO<sub>4</sub> (636.6 mg, 3.0 mmol) and THF (4.0 mL) were added under N<sub>2</sub> atmosphere. The reaction mixture was stirred at 80 °C for 12 h. After being cooled to room temperature, the reaction mixture was diluted with EtOAc (10-20 mL), filtered through a pad of celite, and then the solvent of filtrate was removed under reduced pressure. The residue was purified by flash column chromatography (petroleum ether/ethyl acetate = 6/1, v/v) to afford the desired product as an off-white solid (317 mg, 90%). M.p.: 112-114 °C; <sup>1</sup>H NMR (400 MHz, DMSO-*d*<sub>6</sub>): δ (ppm) 9.37 (s, 1H), 7.48 (d, *J* = 8.4 Hz, 2H), 7.34-7.24 (m, 6H), 7.04-6.99 (m, 8H), 6.83 (d, *J* = 8.4 Hz, 1H), 2.17 (s, 3H); <sup>13</sup>C NMR (100 MHz, DMSO-*d*<sub>6</sub>): δ (ppm) 154.9, 147.2, 145.5, 135.0, 130.3, 129.5, 128.5, 126.9, 124.5, 124.2, 124.0, 123.6, 122.8, 115.0, 16.1; HRMS (ESI<sup>+</sup>): calcd for C<sub>25</sub>H<sub>22</sub>NO [M+H]<sup>+</sup> 352.1701, found 352.1694.

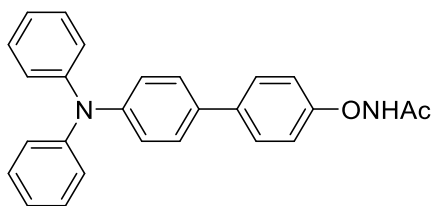

#### **N-(4'-(Diphenylamino)biphenyl-4-yloxy)acetamide (6a)**

The synthesis of **6a** was followed by the procedure described in previous method.<sup>3</sup> 4'-(Diphenylamino)biphenyl-4-ol (800 mg, 2.37 mmol) was dissolved in 7 mL of methanol, and then potassium *tert*-butoxide (267 mg, 2.37 mmol) was added. The mixture was allowed to stir for 0.5 h under N<sub>2</sub> atmosphere. Methanol was removed, and the residue was taken up in 5 mL of dichloromethane. The freshly prepared *O*-mesitylsulfonylhydroxylamine (380 mg, 1.77 mmol) in 5 mL of dichloromethane was then added under ice cooling. The mixture was

allowed to stir for 1 h, and dichloromethane was then removed under reduce pressure to afford 4'-(aminooxy)-*N,N*-diphenyl-[1,1'-biphenyl]-4-amine.

A biphasic mixture of Na<sub>2</sub>CO<sub>3</sub> (190 mg, 1.8 mmol) in 1 mL of H<sub>2</sub>O and 2 mL of EtOAc was next added to the reaction flask. The resulting solution was kept under ice cooling, followed by dropwise addition of acetyl chloride (138.9 mg, 1.77 mmol). After being stirred at 0 °C for 2 h, the reaction was quenched with sat. NaHCO<sub>3</sub> and diluted with EtOAc. The organic phase was washed twice with sat. NaHCO<sub>3</sub>, dried over Na<sub>2</sub>SO<sub>4</sub>, filtered, and evaporated under reduced pressure. The residue was purified by flash column chromatography (CH<sub>2</sub>Cl<sub>2</sub>/ethyl acetate = 8/1-4/1, v/v) afforded the desired product as a white solid (446 mg, 64%) with the recovery of 28% of unreacted 4'-(diphenylamino)biphenyl-4-ol (220 mg, 28%). M.p.: 148-150 °C; <sup>1</sup>H NMR (400 MHz, DMSO-*d*<sub>6</sub>): δ (ppm) 11.71 (s, 1H), 7.58 (d, *J* = 8.8 Hz, 2H), 7.54 (d, *J* = 8.4 Hz, 2H), 7.31 (t, *J* = 8.4 Hz, 4H), 7.07-7.02 (m, 10H), 1.93 (s, 3H); <sup>13</sup>C NMR (100 MHz, DMSO-*d*<sub>6</sub>): δ (ppm) 158.8, 147.1, 146.3, 133.8, 129.5, 127.3, 127.2, 123.9, 123.6, 123.0, 113.4, 19.4; HRMS (ESI<sup>+</sup>): calcd for C<sub>26</sub>H<sub>23</sub>N<sub>2</sub>O<sub>2</sub> [M+H]<sup>+</sup> 395.1760, found 395.1764.

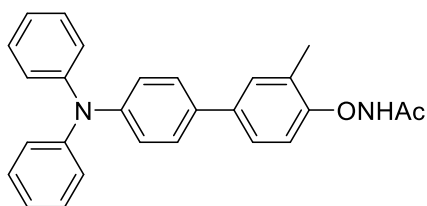

### ***N*-(4'-(Diphenylamino)-3-methylbiphenyl-4-yloxy)acetamide (6b)**

The synthesis of **6b** was followed by the procedure described in previous method.<sup>3</sup> 4'-(Diphenylamino)-3-methylbiphenyl-4-ol (1.63 g, 4.64 mmol) was dissolved in 10 mL of methanol, and then potassium *tert*-butoxide (520 mg, 4.64 mmol) was added. The mixture was allowed to stir for 0.5 h under N<sub>2</sub> atmosphere. Methanol was removed, and the residue was taken up in 8 mL of dichloromethane. The freshly prepared *O*-

mesitylsulfonylhydroxylamine (572 mg, 2.67 mmol) in 8 mL of dichloromethane was then added under ice cooling. The mixture was allowed to stir for 1 h, and dichloromethane was then removed under reduce pressure to afford 4'-(aminooxy)-3'-methyl-*N,N*-diphenyl-[1,1'-biphenyl]-4-amine.

A biphasic mixture of Na<sub>2</sub>CO<sub>3</sub> (817 mg, 2.67 mmol) in 1 mL of H<sub>2</sub>O and 2 mL of EtOAc was next added to the reaction flask. The resulting solution was kept under ice cooling, followed by dropwise addition of acetyl chloride (209 mg, 2.66 mmol). After being stirred at 0 °C for 2 h, the reaction was quenched with sat. NaHCO<sub>3</sub> and diluted with EtOAc. The organic phase was washed twice with sat. NaHCO<sub>3</sub>, dried over Na<sub>2</sub>SO<sub>4</sub>, filtered, and evaporated under reduced pressure. The residue was purified *via* silica gel column chromatography (CH<sub>2</sub>Cl<sub>2</sub>/ethyl acetate = 8/1-4/1, v/v) afforded the desired product as a white solid (490 mg, 45%) with the recovery of 34% of unreacted 4'-(diphenylamino)-3-methylbiphenyl-4-ol (560 mg, 34%). M.p.: 126-128 °C; <sup>1</sup>H NMR (400 MHz, DMSO-*d*<sub>6</sub>): δ (ppm) 11.70 (s, 1H), 7.53 (d, *J* = 8.4 Hz, 2H), 7.44 (s, 1H), 7.40 (d, *J* = 8.4 Hz, 1H), 7.31 (t, *J* = 7.6 Hz, 3H), 7.06-7.02 (m, 10H), 2.26 (s, 3H), 1.93 (s, 3H); <sup>13</sup>C NMR (100 MHz, DMSO-*d*<sub>6</sub>): δ (ppm) 167.1, 156.8, 147.1, 146.2, 134.0, 133.6, 129.5, 128.6, 127.3, 124.6, 123.9, 123.8, 123.7, 123.0, 112.1, 19.4, 15.6; HRMS (ESI<sup>+</sup>): calcd for C<sub>27</sub>H<sub>24</sub>N<sub>2</sub>O<sub>2</sub>Na [M+Na]<sup>+</sup> 431.1735, found 431.1737.

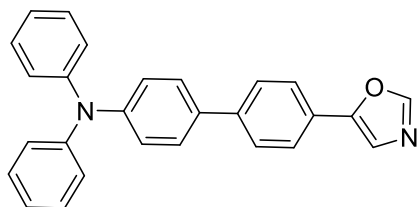

#### 4'-(Oxazol-5-yl)-*N,N*-diphenyl-[1,1'-biphenyl]-4-amine (**8**)

Compound **8** was synthesized according to the literature procedure.<sup>3b</sup> To a reaction tube with a magnetic stirring bar, Pd(OAc)<sub>2</sub> (5 mol%, 11.3 mg, 50 μmol), XPhos (10 mol%, 47.7 mg, 0.1

mmol), 5-(4'-bromophenyl)oxazole (223.0 mg, 1.0 mmol) and 4-(diphenylamino)phenylboronic acid (578.0 mg, 2.0 mmol), K<sub>3</sub>PO<sub>4</sub> (636.6 mg, 3.0 mmol) and THF (4.0 mL) were added under N<sub>2</sub> atmosphere. The reaction mixture was stirred at 80 °C for 12 h. The reaction mixture was then cooled to ambient temperature, diluted with 10-20 mL of EtOAc, filtered through a celite pad, and washed with 10-20 mL of EtOAc. Organic solvent was removed under reduced pressure. The residue was purified by flash column chromatography (petroleum ether/ethyl acetate = 7/1, v/v) to afford the desired product as a pale yellow solid (365 mg, 94%). M.p.: 138-140 °C; <sup>1</sup>H NMR (400 MHz, CDCl<sub>3</sub>): δ (ppm) 7.93 (s, 1H), 7.71 (d, *J* = 8.4 Hz, 2H), 7.64 (d, *J* = 8.4 Hz, 2H), 7.50 (d, *J* = 8.8 Hz, 2H), 7.38 (s, 1H), 7.30-7.26 (m, 4H), 7.16-7.14 (m, 6H), 7.06 (t, *J* = 7.2 Hz, 2H); <sup>13</sup>C NMR (100 MHz, CDCl<sub>3</sub>): δ (ppm) 151.6, 150.5, 147.8, 147.7, 141.0, 134.0, 129.5, 127.7, 127.1, 126.3, 125.0, 124.7, 123.8, 123.3, 121.5; HRMS (ESI<sup>+</sup>): calcd for C<sub>27</sub>H<sub>21</sub>N<sub>2</sub>O [M+H]<sup>+</sup> 389.1654, found 389.1651.

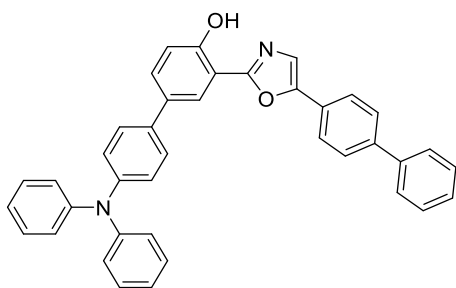

### 3-(5-([1,1'-Biphenyl]-4-yl)oxazol-2-yl)-4'-(diphenylamino)-[1,1'-biphenyl]-4-ol (1)

A flame-dried Schlenk test tube with a magnetic stir bar was charged with **6a** (157.6 mg, 0.4 mmol), 5-([1,1'-biphenyl]-4-yl)oxazole (132.6 mg, 0.6 mmol), [RhCp\*Cl<sub>2</sub>]<sub>2</sub> (5.0 mol%, 12.8 mg), AgSbF<sub>6</sub> (20 mol%, 27.2 mg), PivOH (82.0 mg, 0.8 mmol), CsOPiv (76.0 mg, 0.32 mmol), Ag<sub>2</sub>CO<sub>3</sub> (44.0 mg, 0.16 mmol) and DMF (3.0 mL) under N<sub>2</sub> atmosphere. The resulting mixture was stirred for 5 min at room temperature, and then heated at 140 °C for 24 h. The reaction mixture was cooled to ambient temperature, and diluted with EtOAc. The mixture was filtered through a celite pad and washed with EtOAc. The organic phase was then washed

with brine, dried over Na<sub>2</sub>SO<sub>4</sub>, and evaporated under vacuum. The residue was purified by flash column chromatography (petroleum ether/ethyl acetate = 7/1, v/v) afforded the desired product as a pale yellow solid (110 mg, 49%). M.p.: 220-222 °C; <sup>1</sup>H NMR (400 MHz, CDCl<sub>3</sub>): δ (ppm) 11.20 (s, 1 H), 8.13 (d, *J* = 2.0 Hz, 1H), 7.82 (d, *J* = 8.0 Hz, 2H), 7.70 (d, *J* = 8.0 Hz, 2H), 7.64 (d, *J* = 7.6 Hz, 2H), 7.60 (dd, *J* = 8.4 Hz, 1.6 Hz, 1H), 7.53-7.46 (m, 5H), 7.39 (t, *J* = 7.2 Hz, 1H), 7.29 (t, *J* = 8.0 Hz, 4H), 7.19-7.15 (m, 7H), 7.05 (t, *J* = 7.2 Hz, 2H); <sup>13</sup>C NMR (100 MHz, CDCl<sub>3</sub>): δ (ppm) 161.0, 156.8, 150.2, 147.9, 147.1, 141.8, 140.3, 134.6, 132.6, 131.0, 129.4, 129.1, 127.9, 127.8, 127.6, 127.1, 126.4, 125.0, 124.5, 124.3, 123.8, 123.1, 121.5, 117.8, 111.4; HRMS (ESI<sup>+</sup>): calcd for C<sub>39</sub>H<sub>29</sub>N<sub>2</sub>O<sub>2</sub> [M+H]<sup>+</sup> 557.2229, found 557.2229.

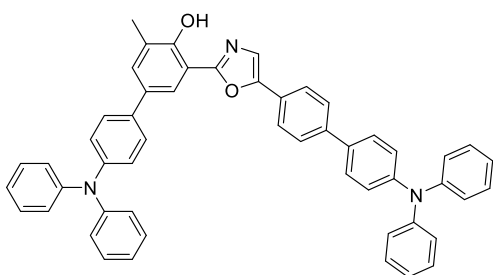

**4'-(Diphenylamino)-3-(5-(4'-(diphenylamino)biphenyl-4-yl)oxazol-2-yl)-5-methylbiphenyl-4-ol (2)**

A flame-dried Schlenk test tube with a magnetic stir bar was charged with **6b** (163.2 mg, 0.4 mmol), **8** (232.8 mg, 0.6 mmol), [RhCp\*Cl<sub>2</sub>]<sub>2</sub> (5.0 mol%, 12.8 mg), AgSbF<sub>6</sub> (20 mol%, 27.2 mg), PivOH (82.0 mg, 0.8 mmol), CsOPiv (76.0 mg, 0.32 mmol), Ag<sub>2</sub>CO<sub>3</sub> (44.0 mg, 0.16 mmol) and DMF (3.0 mL) under N<sub>2</sub> atmosphere. The resulting mixture was stirred for 5 min at room temperature, and then heated at 140 °C for 24 h. The reaction mixture was cooled to ambient temperature, and diluted with EtOAc. The mixture was filtered through a celite pad and washed with EtOAc. The organic phase was then washed with brine, dried over Na<sub>2</sub>SO<sub>4</sub>, and evaporated under vacuum. The residue was purified by flash column chromatography (petroleum ether/ethyl acetate = 7/1, v/v) afforded the desired product as a pale yellow

solid (132 mg, 45%).  $^1\text{H}$  NMR (400 MHz,  $\text{DMSO}-d_6$ ):  $\delta$  (ppm) 11.31 (s, 1H), 8.05 (s, 1H), 8.00 (s, 1H), 7.95 (d,  $J = 7.6$  Hz, 2H), 7.75 (d,  $J = 8.0$  Hz, 2H), 7.64 (d,  $J = 8.4$  Hz, 4H), 7.60 (s, 1H), 7.35-7.30 (m, 8H), 7.10-7.04 (m, 16H), 2.31 (s, 3H);  $^{13}\text{C}$  NMR (100 MHz,  $\text{CDCl}_3$ ):  $\delta$  (ppm) 150.2, 147.9, 147.8, 147.7, 141.1, 137.9, 135.0, 133.9, 132.1, 131.0, 129.5, 129.4, 127.7, 127.6, 127.21, 127.17, 125.9, 124.9, 124.5, 124.4, 123.8, 123.3, 123.0, 121.5, 121.2, 110.8, 16.4; HRMS ( $\text{ESI}^+$ ): calcd for  $\text{C}_{52}\text{H}_{40}\text{N}_3\text{O}_2$   $[\text{M}+\text{H}]^+$  738.3121, found 738.3114.

#### IV. Absorption spectra of **1** and **2** in toluene

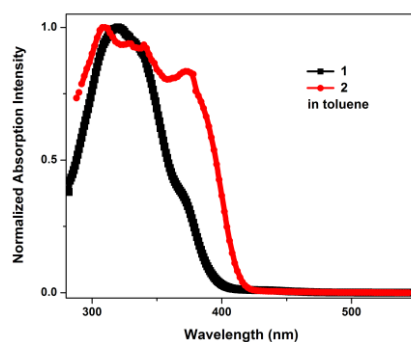

**Fig. S1** Normalized absorption spectra of **1** and **2** in toluene ( $5.0 \times 10^{-5}$  mol  $\text{L}^{-1}$ ).

#### V. Thermal and electrochemistry properties of **1** and **2**

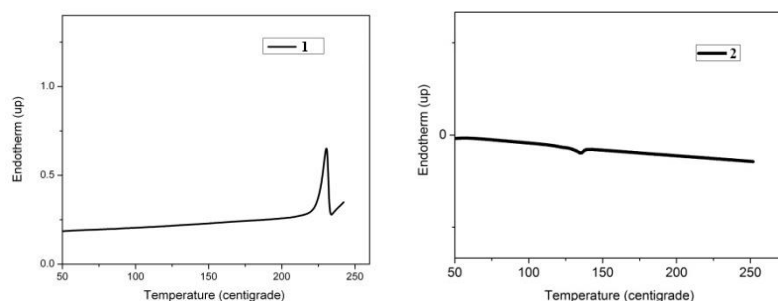

**Fig. S2** Differential scanning calorimetry (DSC) graphs of **1** and **2**.

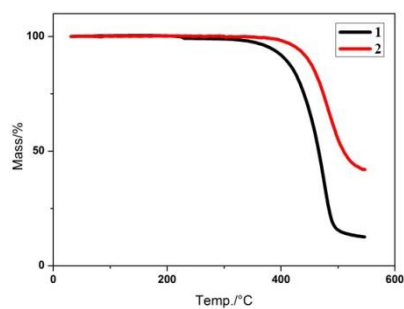

**Fig. S3** Thermogravimetric analysis (TGA) curves of **1** and **2**.

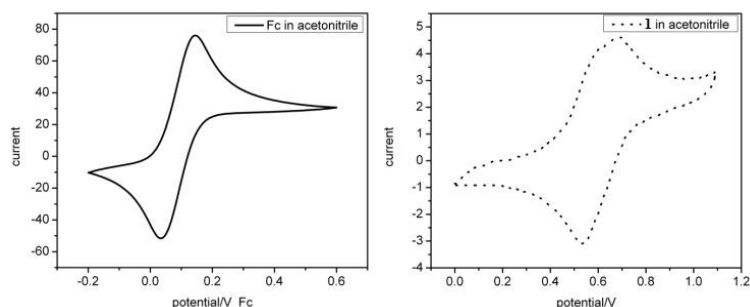

**Fig. S4** The oxidation potential of **1** was determined relative to  $\text{Ag}/\text{Ag}^+$  in  $5.0 \times 10^{-4} \text{ mol L}^{-1}$  acetonitrile solution, with the  $\text{Fc}/\text{Fc}^+$  as the external standard. Cyclic voltammogram of  $\text{Fc}/\text{Fc}^+$  in acetonitrile.

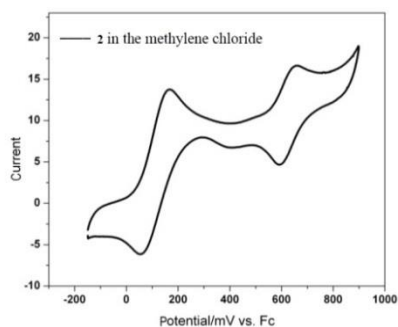

**Fig. S5** Cyclic voltammogram of **2** in methylene chloride. The oxidation potentials were determined relative to  $\text{Ag}/\text{Ag}^+$  in  $5.0 \times 10^{-4} \text{ mol L}^{-1}$  methylene chloride solution, using  $\text{Fc}/\text{Fc}^+$  as internal reference.

**Table S1.** The thermal and electrochemistry data of **1** and **2**.

| Compounds | $E_g^{\text{opt}}$ (eV) <sup>a</sup> | $E_{\text{on}}^{\text{ox}}$ (eV) | HOMO (eV) <sup>d</sup> | LUMO (eV) <sup>e</sup> | $T_d$ [°C] <sup>f</sup> |
|-----------|--------------------------------------|----------------------------------|------------------------|------------------------|-------------------------|
| <b>1</b>  | 3.17                                 | 0.47 <sup>b</sup>                | -5.27                  | -2.10                  | 381                     |
| <b>2</b>  | 2.95                                 | 0.42 <sup>c</sup>                | -5.22                  | -2.27                  | 430                     |

$^a E_g^{\text{opt}} = 1240/\lambda_{\text{onset}}$  (eV).  $^b$  Estimated from the oxidation onset of the cyclic voltammetry in  $5.0 \times 10^{-4}$  mol  $\text{L}^{-1}$  acetonitrile solution.  $^c$  Estimated from the oxidation onset of the cyclic voltammetry in  $5.0 \times 10^{-4}$  mol  $\text{L}^{-1}$   $\text{CH}_2\text{Cl}_2$  solution.  $^d \text{HOMO} = -(4.8 + E_{\text{on}}^{\text{ox}})$  (eV).  $^e \text{LUMO} = (\text{HOMO} + E_g^{\text{opt}})$  (eV).  $^f$  Temperature at 5.0% weight loss under nitrogen. The heating rate was  $10^\circ\text{C}\cdot\text{min}^{-1}$ .

## VI. Device schematic and device structure

ITO = indium tin oxide,  $\text{MoO}_3$  = molybdenum oxide, TAPC = 1,1-bis{(di-4-tolylamino)phenyl}cyclohexane,  $\text{CBZ}_2\text{-F}_1$  = 3,3'-(9H-fluorene-9,9-diyl)bis(9-phenyl-9H-carbazole), TBCPF = 9,9-di(4,4'-bis(3,6-di-*tert*-butyl-9H-carbazole)-phenyl)-9H-fluorene, TmPyPB = 1,3,5-tri(*m*-pyrid-3-ylphenyl)benzene, Tm3PyP26PyB = 1,3,5-tris(6-(3-(pyridin-3-yl)phenyl)pyridin-2-yl)benzene, LiF = lithium fluoride, Al = aluminium.

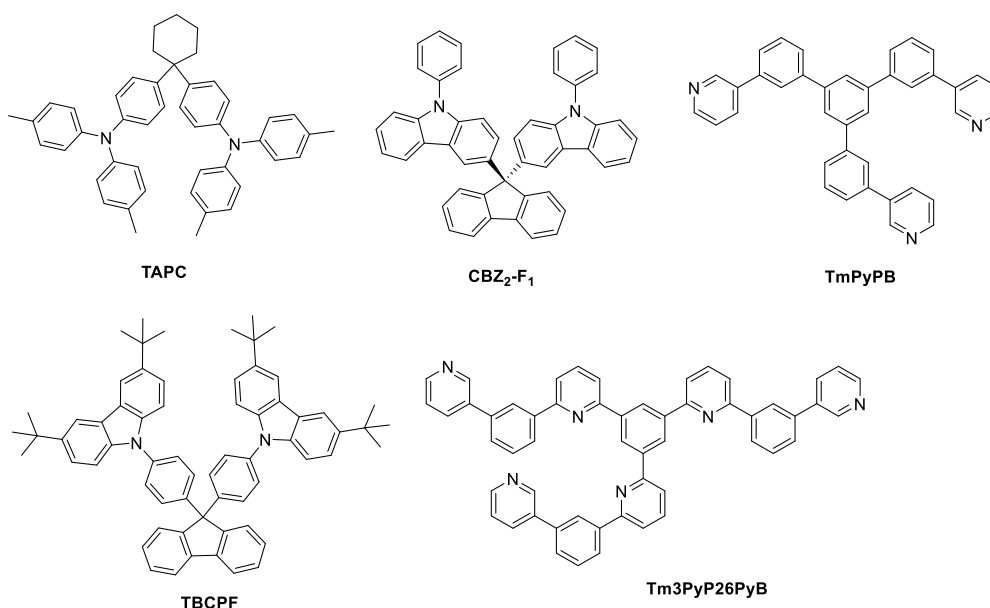

**1-based devices:**

**1 (x%) in  $\text{CBZ}_2\text{-F}_1$ :** ITO/ $\text{MoO}_3$  (3 nm)/TAPC (50 nm)/**1 (x wt%)**:  $\text{CBZ}_2\text{-F}_1$  (20 nm)/TmPyPB (50 nm)/LiF (1 nm)/Al (100 nm)

**1 (x%) in TBCPF:** ITO/ $\text{MoO}_3$  (3 nm)/TAPC (50 nm)/**1 (x wt%)**: TBCPF (20 nm)/TmPyPB (50 nm)/LiF (1 nm)/Al (100 nm)

**2-based devices:**

**2 (x%)** in **CBZ<sub>2</sub>-F<sub>1</sub>**: ITO/MoO<sub>3</sub> (3 nm)/TAPC (50 nm)/**2 (x wt%)**:CBZ<sub>2</sub>-F<sub>1</sub> (20 nm)/Tm3PyP26PyB (50 nm)/LiF (1 nm)/Al (100 nm)

**2 (x%)** in **TBCPF**: ITO/MoO<sub>3</sub> (3 nm)/TAPC (50 nm)/**2 (x wt%)**:TBCPF (20 nm)/Tm3PyP26PyB (50 nm)/LiF (1 nm)/Al (100 nm)

**Table S2.** Device performance with **1** and **2** as the emitter

| Device                                            | $V_{\text{turn-on}}^a$<br>(V) | $\text{CIE}_{1931}^b$<br>[x, y] | $\text{EQE}_{\text{max}}^c$<br>[%] | $\text{CE}_{\text{max}}^d$<br>[cd A <sup>-1</sup> ] | $\text{PE}_{\text{max}}^e$<br>[lm W <sup>-1</sup> ] | $L_{\text{max}}^f$<br>[cd m <sup>-2</sup> ] | Device performance<br>at 1000 cd m <sup>-2</sup> |                          |
|---------------------------------------------------|-------------------------------|---------------------------------|------------------------------------|-----------------------------------------------------|-----------------------------------------------------|---------------------------------------------|--------------------------------------------------|--------------------------|
|                                                   |                               |                                 |                                    |                                                     |                                                     |                                             | EQE [%]                                          | PE [lm W <sup>-1</sup> ] |
| <b>1</b> (3%) in CBZ <sub>2</sub> -F <sub>1</sub> | 3.4                           | (0.25, 0.42)                    | 3.7                                | 10.21                                               | 8.43                                                | 10307                                       | 2.5                                              | 3.87                     |
| <b>1</b> (5%) in CBZ <sub>2</sub> -F <sub>1</sub> | 3.4                           | (0.25, 0.42)                    | 3.8                                | 10.69                                               | 9.07                                                | 10105                                       | 2.5                                              | 4.08                     |
| <b>1</b> (7%) in CBZ <sub>2</sub> -F <sub>1</sub> | 3.4                           | (0.25, 0.42)                    | 4.1                                | 11.77                                               | 10.38                                               | 10876                                       | 2.7                                              | 4.31                     |
| <b>1</b> (9%) in CBZ <sub>2</sub> -F <sub>1</sub> | 3.4                           | (0.24, 0.42)                    | 3.9                                | 11.13                                               | 9.72                                                | 9800                                        | 2.6                                              | 3.90                     |
| <b>1</b> (3%) in TBCPF                            | 3.7                           | (0.24, 0.41)                    | 3.6                                | 9.28                                                | 7.47                                                | 4243                                        | 2.5                                              | 3.45                     |
| <b>1</b> (5%) in TBCPF                            | 3.6                           | (0.24, 0.40)                    | 3.5                                | 9.39                                                | 7.72                                                | 4822                                        | 2.4                                              | 3.44                     |
| <b>1</b> (7%) in TBCPF                            | 3.7                           | (0.25, 0.41)                    | 5.3                                | 14.54                                               | 12.34                                               | 4715                                        | 2.8                                              | 3.47                     |
| <b>1</b> (9%) in TBCPF                            | 3.6                           | (0.24, 0.39)                    | 3.9                                | 10.19                                               | 8.88                                                | 4629                                        | 2.5                                              | 3.58                     |
| <b>2</b> (1%) in CBZ <sub>2</sub> -F <sub>1</sub> | 3.5                           | (0.18, 0.15)                    | 6.7                                | 8.18                                                | 7.46                                                | 9124                                        | 4.4                                              | 2.64                     |
| <b>2</b> (2%) in CBZ <sub>2</sub> -F <sub>1</sub> | 3.5                           | (0.18, 0.16)                    | 8.0                                | 9.97                                                | 8.95                                                | 8101                                        | 4.2                                              | 2.60                     |
| <b>2</b> (4%) in CBZ <sub>2</sub> -F <sub>1</sub> | 3.5                           | (0.18, 0.16)                    | 5.8                                | 7.77                                                | 6.77                                                | 14143                                       | 4.1                                              | 2.54                     |
| <b>2</b> (6%) in CBZ <sub>2</sub> -F <sub>1</sub> | 3.4                           | (0.18, 0.17)                    | 6.0                                | 7.77                                                | 6.46                                                | 14143                                       | 4.2                                              | 2.54                     |
| <b>2</b> (4%) in CBZ <sub>2</sub> -F <sub>1</sub> | 4.2                           | (0.18, 0.15)                    | 5.8                                | 7.28                                                | 5.44                                                | 6378                                        | 4.1                                              | 2.50                     |
| <b>2</b> (6%) in TBCPF                            | 4.2                           | (0.18, 0.16)                    | 6.1                                | 8.00                                                | 5.98                                                | 6125                                        | 4.0                                              | 2.59                     |
| <b>2</b> (8%) in TBCPF                            | 4.3                           | (0.18, 0.16)                    | 7.5                                | 9.75                                                | 7.12                                                | 8763                                        | 4.4                                              | 2.82                     |
| <b>2</b> (10%) in TBCPF                           | 4.3                           | (0.18, 0.15)                    | 7.0                                | 8.92                                                | 6.52                                                | 8942                                        | 4.4                                              | 2.76                     |

<sup>a</sup>Turn on voltage at a brightness of 1 cd m<sup>-2</sup>. <sup>b</sup>1 mA/cm<sup>2</sup>. <sup>c</sup>External quantum efficiency. <sup>d</sup>Maximum current efficiency. <sup>e</sup>Maximum power efficiency. <sup>f</sup>Maximum luminance.

Other devices with **1** as the emitter:

Device I: ITO/MoO<sub>3</sub> (3 nm)/TAPC (50 nm)/**1** (7 wt%):TBCPF (**10 nm**)/TmPyPB (50 nm)/LiF (1 nm)/Al (100 nm)

Device II: ITO/MoO<sub>3</sub> (3 nm)/TAPC (50 nm)/**1** (7 wt%):TBCPF (**15 nm**)/TmPyPB (50 nm)/LiF (1 nm)/Al (100 nm)

Device III: ITO/MoO<sub>3</sub> (3 nm)/TAPC (**60 nm**)/**1** (7 wt%):TBCPF (20 nm)/TmPyPB (**40 nm**)/LiF (1 nm)/Al (100 nm)

Device **IV**: ITO/MoO<sub>3</sub> (3 nm)/TAPC (60 nm)/**1** (7 wt%):TBCPF (20 nm)/TmPyPB (50 nm)/LiF (1 nm)/Al (100 nm)

Device **V**: ITO/MoO<sub>3</sub> (3 nm)/TAPC (50 nm)/**1** (7 wt%):TBCPF (20 nm)/TmPyPB (60 nm)/LiF (1 nm)/Al (100 nm)

**Table S3.** Device performance with **1** as the emitter

| Device     | $V_{\text{turn-on}}^a$<br>(V) | $\text{CIE}_{1931}^b$<br>[x, y] | $\text{EQE}_{\text{max}}^c$<br>[%] | $\text{CE}_{\text{max}}^d$<br>[cd A <sup>-1</sup> ] | $\text{PE}_{\text{max}}^e$<br>[lm W <sup>-1</sup> ] | $L_{\text{max}}^f$<br>[cd m <sup>-2</sup> ] | Device performance at 1000 cd m <sup>-2</sup> |                          |
|------------|-------------------------------|---------------------------------|------------------------------------|-----------------------------------------------------|-----------------------------------------------------|---------------------------------------------|-----------------------------------------------|--------------------------|
|            |                               |                                 |                                    |                                                     |                                                     |                                             | EQE [%]                                       | PE [lm W <sup>-1</sup> ] |
| <b>I</b>   | 3.3                           | (0.25, 0.42)                    | 2.8                                | 5.09                                                | 6.93                                                | 4766                                        | 1.8                                           | 2.81                     |
| <b>II</b>  | 3.5                           | (0.24, 0.41)                    | 3.6                                | 5.87                                                | 8.48                                                | 4851                                        | 2.2                                           | 3.07                     |
| <b>III</b> | 3.7                           | (0.23, 0.40)                    | 2.7                                | 4.26                                                | 5.98                                                | 3946                                        | 1.6                                           | 2.19                     |
| <b>IV</b>  | 3.6                           | (0.23, 0.40)                    | 3.5                                | 5.96                                                | 7.76                                                | 4711                                        | 2.3                                           | 3.02                     |
| <b>V</b>   | 3.7                           | (0.24, 0.41)                    | 5.1                                | 7.01                                                | 11.70                                               | 5024                                        | 2.6                                           | 3.34                     |

<sup>a</sup>Turn on voltage at a brightness of 1 cd m<sup>-2</sup>. <sup>b</sup>1 mA/cm<sup>2</sup>. <sup>c</sup>External quantum efficiency. <sup>d</sup>Maximum current efficiency. <sup>e</sup>Maximum power efficiency. <sup>f</sup>Maximum luminance.

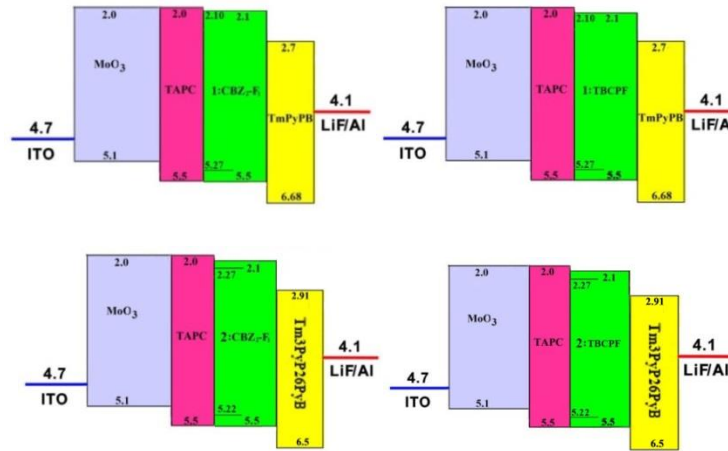

**Fig. S6** Energy level diagrams (eV) of the fabricated devices (Device schematic).

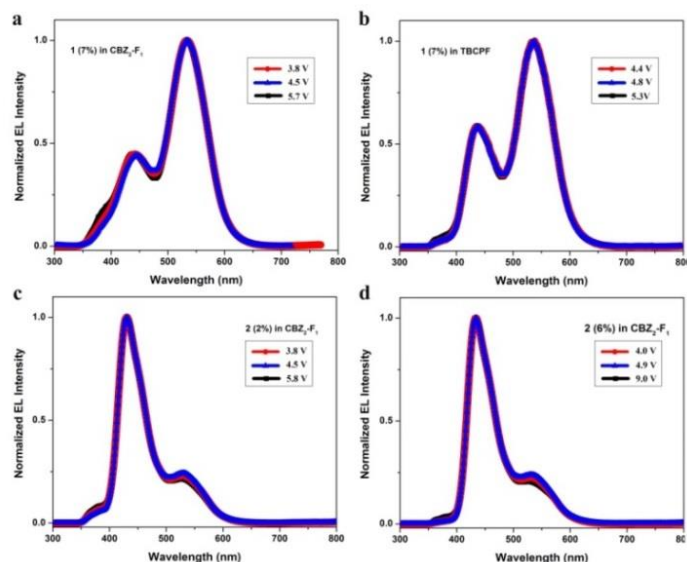

**Fig. S7** EL spectra of devices **1** (7%) in CBZ<sub>2</sub>-F<sub>1</sub> (a), **1** (7%) in TBCPF (b), **2** (2%) in CBZ<sub>2</sub>-F<sub>1</sub> (c) and **2** (6%) in CBZ<sub>2</sub>-F<sub>1</sub> (d) under different driving voltages.

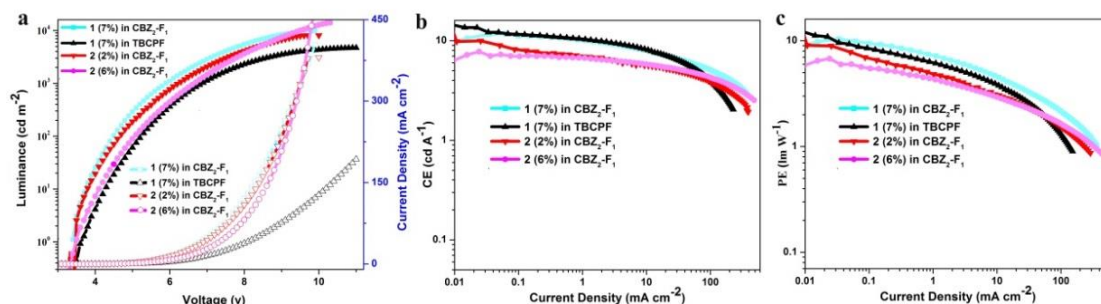

**Fig. S8** (a) Brightness-current density-voltage ( $B$ - $J$ - $V$ ) characteristics of devices **1** (7%) in CBZ<sub>2</sub>-F<sub>1</sub>, **1** (7%) in TBCPF, **2** (2%) in CBZ<sub>2</sub>-F<sub>1</sub> and **2** (6%) in CBZ<sub>2</sub>-F<sub>1</sub>. (b) The EL efficiency-current density curves of devices **1** (7%) in CBZ<sub>2</sub>-F<sub>1</sub>, **1** (7%) in TBCPF, **2** (2%) in CBZ<sub>2</sub>-F<sub>1</sub> and **2** (6%) in CBZ<sub>2</sub>-F<sub>1</sub>. (c) The PE efficiency-current density curves of devices **1** (7%) in CBZ<sub>2</sub>-F<sub>1</sub>, **1** (7%) in TBCPF, **2** (2%) in CBZ<sub>2</sub>-F<sub>1</sub> and **2** (6%) in CBZ<sub>2</sub>-F<sub>1</sub>.

## VII. Absorption spectra of **1** and **2** in film

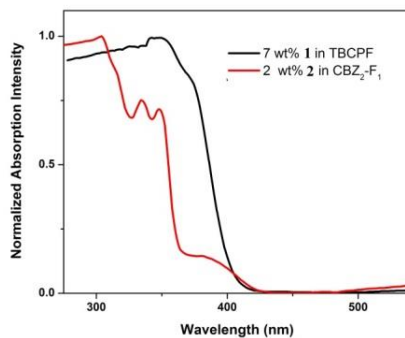

**Fig. S9** Normalized absorption spectra of **1** in film (7 wt% in TBCPF) and **2** in film (2 wt% in CBZ<sub>2</sub>-F<sub>1</sub>).

## VIII. Transient emission spectra of **1**, **2** and DHPZ-2BN and oxygen quenching experiments.

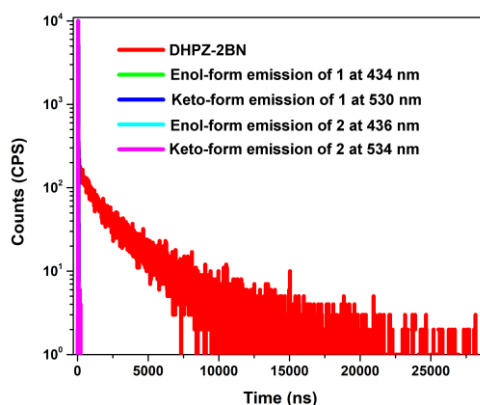

**Fig. S10** Transient emission spectra of **1**, **2** and DHPZ-2BN in doped film at room temperature. 5 wt% DHPZ-2BN in TBCPF; enol-form emission of **1** at 434 nm and keto-form emission of **1** at 530 nm in doped film (7 wt% **1** in TBCPF); enol-form emission of **2** at 436 nm and keto-form emission of **2** at 534 nm in doped film (2 wt% **2** in CBZ<sub>2</sub>-F<sub>1</sub>).

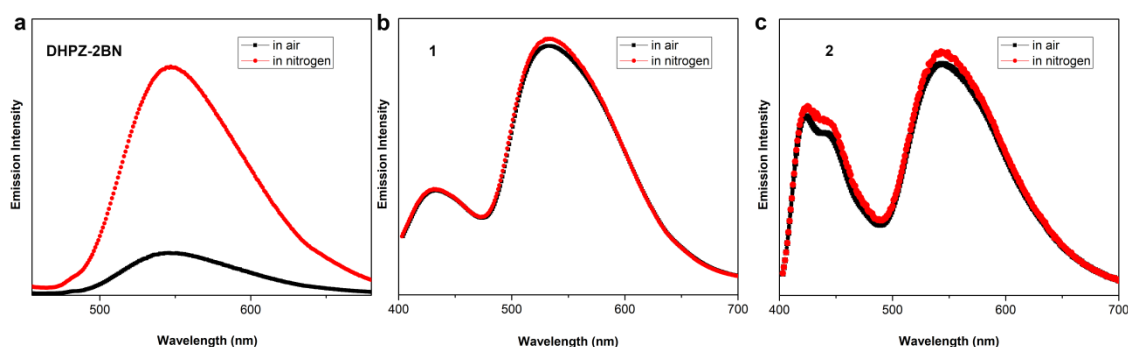

**Fig. S11** (a) PL spectra of DHPZ-2BN in toluene (concentration:  $1 \times 10^{-5} \text{ mol L}^{-1}$ ) in air and under an nitrogen atmosphere at room temperature. (b) PL spectra of **1** in toluene (concentration:  $5 \times 10^{-5} \text{ mol L}^{-1}$ ) in air and under an nitrogen atmosphere at room temperature. (c) PL spectra of **2** in toluene (concentration:  $5 \times 10^{-5} \text{ mol L}^{-1}$ ) in air and under an nitrogen atmosphere at room temperature. Nitrogen and air bubbling for 30 min.

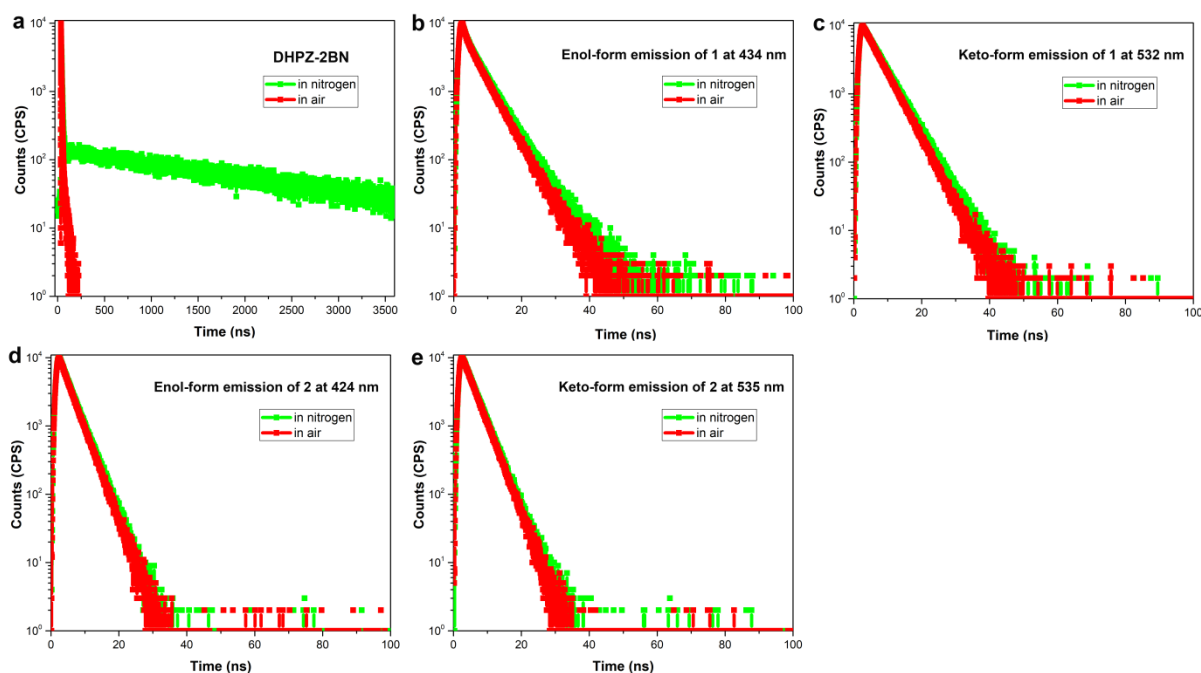

**Fig. S12** (a) Transient emission spectra of DHPZ-2BN in toluene ( $1 \times 10^{-5}$  mol L $^{-1}$ ) at room temperature under different atmospheres. (b), (c) Transient emission spectra of **1** in toluene ( $5 \times 10^{-5}$  mol L $^{-1}$ ) at room temperature under different atmospheres. (d), (e) Transient emission spectra of **2** in toluene ( $5 \times 10^{-5}$  mol L $^{-1}$ ) at room temperature under different atmospheres. Nitrogen and air bubbling for 30 min.

**Table S4.** Excited state lifetimes of DHPZ-2BN ( $1 \times 10^{-5}$  mol L $^{-1}$ ), **1** ( $5 \times 10^{-5}$  mol L $^{-1}$ ) and **2** ( $5 \times 10^{-5}$  mol L $^{-1}$ ) in toluene in air and under an nitrogen atmosphere at room teperature.<sup>a</sup>

|                                          | In nitrogen                                                                     |                   | In air                                                                          |                   |
|------------------------------------------|---------------------------------------------------------------------------------|-------------------|---------------------------------------------------------------------------------|-------------------|
|                                          | Life time                                                                       | Average life time | Life time                                                                       | Average life time |
| DHPZ-2BN                                 | $\tau_1 = 6.79$ ns,<br>(25%)<br>$\tau_2 = 1891$ ns,<br>(75%)<br>$\chi^2 = 1.02$ | 1419.94 ns        | $\tau_1 = 4.92$ ns,<br>(94%)<br>$\tau_2 = 25.8$ ns,<br>(6%)<br>$\chi^2 = 1.03$  | 6.17 ns           |
| Enol-form emission of <b>1</b> at 434 nm | $\tau_1 = 0.93$ ns,<br>(54%)<br>$\tau_2 = 5.01$ ns,<br>(46%)<br>$\chi^2 = 1.03$ | 2.83 ns           | $\tau_1 = 0.81$ ns,<br>(55%)<br>$\tau_2 = 4.69$ ns,<br>(45%)<br>$\chi^2 = 1.02$ | 2.56 ns           |
| Keto-form emission of <b>1</b> at 532 nm | $\tau_1 = 4.74$ ns,<br>$\chi^2 = 1.08$                                          | 4.74 ns           | $\tau_1 = 4.54$ ns,<br>$\chi^2 = 1.06$                                          | 4.54 ns           |
| Enol-form emission of <b>2</b> at 424 nm | $\tau_1 = 0.62$ ns,<br>(5%)<br>$\tau_2 = 3.41$ ns,<br>(95%)<br>$\chi^2 = 1.00$  | 3.27 ns           | $\tau_1 = 0.49$ ns,<br>(5%)<br>$\tau_2 = 3.21$ ns,<br>(95%)<br>$\chi^2 = 1.10$  | 3.07 ns           |

|                                          |                                        |         |                                        |         |
|------------------------------------------|----------------------------------------|---------|----------------------------------------|---------|
| Keto-form emission of <b>2</b> at 535 nm | $\tau_1 = 3.45$ ns,<br>$\chi^2 = 1.00$ | 3.45 ns | $\tau_1 = 3.33$ ns,<br>$\chi^2 = 1.02$ | 3.33 ns |
|------------------------------------------|----------------------------------------|---------|----------------------------------------|---------|

<sup>a</sup>The excited state lifetimes were determined on a HORIBA TEMPRO-01 instrument.

## IX. Excited state lifetimes of **1** and **2** in other solvents

**Table S5.** Excited state lifetimes of **1** ( $5 \times 10^{-5}$  mol L<sup>-1</sup>) in different solvents at room temperature<sup>a</sup>

| Solvent            | Enol-form                                                                 |                   | Keto-form                                                                 |                   |
|--------------------|---------------------------------------------------------------------------|-------------------|---------------------------------------------------------------------------|-------------------|
|                    | Life time                                                                 | Average life time | Life time                                                                 | Average life time |
| cyclohexane        | $\tau_1 = 0.89$ ns, (34%)<br>$\tau_2 = 3.53$ ns, (66%)<br>$\chi^2 = 1.08$ | 2.69 ns           | $\tau_1 = 3.55$ ns,<br>$\chi^2 = 1.06$                                    | 3.55 ns           |
| benzene            | $\tau_1 = 1.02$ ns, (54%)<br>$\tau_2 = 5.00$ ns, (46%)<br>$\chi^2 = 1.05$ | 2.87 ns           | $\tau_1 = 4.62$ ns,<br>$\chi^2 = 1.05$                                    | 4.62 ns           |
| dioxane            | $\tau_1 = 1.22$ ns, (82%)<br>$\tau_2 = 6.35$ ns, (18%)<br>$\chi^2 = 1.18$ | 2.16 ns           | $\tau_1 = 4.39$ ns,<br>$\chi^2 = 1.06$                                    | 4.39 ns           |
| butyl ether        | $\tau_1 = 1.18$ ns, (75%)<br>$\tau_2 = 4.76$ ns, (25%)<br>$\chi^2 = 1.07$ | 2.07 ns           | $\tau_1 = 4.42$ ns,<br>$\chi^2 = 1.03$                                    | 4.42 ns           |
| chlorobenzene      | $\tau_1 = 2.50$ ns, (39%)<br>$\tau_2 = 5.68$ ns, (61%)<br>$\chi^2 = 1.13$ | 4.45 ns           | $\tau_1 = 4.98$ ns,<br>$\chi^2 = 1.08$                                    | 4.98 ns           |
| chloroform         | $\tau_1 = 2.05$ ns, (78%)<br>$\tau_2 = 8.21$ ns, (22%)<br>$\chi^2 = 1.01$ | 3.41 ns           | $\tau_1 = 4.77$ ns,<br>$\chi^2 = 1.06$                                    | 4.77 ns           |
| ethyl acetate      | $\tau_1 = 2.91$ ns, (77%)<br>$\tau_2 = 6.83$ ns, (23%)<br>$\chi^2 = 1.17$ | 3.80 ns           | $\tau_1 = 4.51$ ns,<br>$\chi^2 = 1.12$                                    | 4.51 ns           |
| tetrahydrofuran    | $\tau_1 = 3.72$ ns, (89%)<br>$\tau_2 = 9.35$ ns, (11%)<br>$\chi^2 = 1.17$ | 4.35 ns           | $\tau_1 = 4.64$ ns,<br>$\chi^2 = 1.09$                                    | 4.64 ns           |
| methylene chloride | $\tau_1 = 2.02$ ns, (92%)<br>$\tau_2 = 6.14$ ns, (8%)<br>$\chi^2 = 1.10$  | 2.36 ns           | $\tau_1 = 3.78$ ns, (69%)<br>$\tau_2 = 6.70$ ns, (31%)<br>$\chi^2 = 1.12$ | 4.69 ns           |
| 1,2-dichloroethane | $\tau_1 = 2.55$ ns, (71%)<br>$\tau_2 = 7.19$ ns, (29%)<br>$\chi^2 = 1.08$ | 3.88 ns           | $\tau_1 = 5.05$ ns, (88%)<br>$\tau_2 = 9.21$ ns, (12%)<br>$\chi^2 = 1.02$ | 5.55 ns           |

<sup>a</sup>The excited state lifetimes were determined on a HORIBA TEMPRO-01 instrument.

**Table S6.** Excited state lifetimes of **2** ( $5 \times 10^{-5}$  mol L<sup>-1</sup>) in different solvents at room temperature.<sup>a</sup>

| Solvent | Enol-form |                   | Keto-form |                   |
|---------|-----------|-------------------|-----------|-------------------|
|         | Life time | Average life time | Life time | Average life time |

|                    |                                                                                             |         |                                           |         |
|--------------------|---------------------------------------------------------------------------------------------|---------|-------------------------------------------|---------|
| cyclohexane        | $\tau_1 = 2.67 \text{ ns}, \chi^2 = 1.15$                                                   | 2.67 ns | $\tau_1 = 2.81 \text{ ns}, \chi^2 = 1.02$ | 2.81 ns |
| hexane             | $\tau_1 = 2.92 \text{ ns}, \chi^2 = 1.06$                                                   | 2.92 ns | $\tau_1 = 3.09 \text{ ns}, \chi^2 = 1.07$ | 3.09 ns |
| benzene            | $\tau_1 = 2.99 \text{ ns}, \chi^2 = 1.25$                                                   | 2.99 ns | $\tau_1 = 3.18 \text{ ns}, \chi^2 = 1.09$ | 3.18 ns |
| dioxane            | $\tau_1 = 0.13 \text{ ns}, (89\%)$<br>$\tau_2 = 2.75 \text{ ns}, (11\%)$<br>$\chi^2 = 1.14$ | 0.41 ns | $\tau_1 = 2.95 \text{ ns}, \chi^2 = 1.06$ | 2.95 ns |
| butyl ether        | $\tau_1 = 1.02 \text{ ns}, (51\%)$<br>$\tau_2 = 2.85 \text{ ns}, (41\%)$<br>$\chi^2 = 1.12$ | 1.92 ns | $\tau_1 = 2.98 \text{ ns}, \chi^2 = 1.01$ | 2.98 ns |
| chlorobenzene      | $\tau_1 = 2.79 \text{ ns}, \chi^2 = 1.09$                                                   | 2.79 ns | $\tau_1 = 3.09 \text{ ns}, \chi^2 = 1.07$ | 3.09 ns |
| chloroform         | $\tau_1 = 2.89 \text{ ns}, \chi^2 = 1.14$                                                   | 2.89 ns | $\tau_1 = 3.14 \text{ ns}, \chi^2 = 1.04$ | 3.14 ns |
| ethyl acetate      | $\tau_1 = 2.72 \text{ ns}, \chi^2 = 1.17$                                                   | 2.72 ns | $\tau_1 = 2.88 \text{ ns}, \chi^2 = 0.97$ | 2.88 ns |
| tetrahydrofuran    | $\tau_1 = 2.75 \text{ ns}, \chi^2 = 1.15$                                                   | 2.75 ns | $\tau_1 = 2.92 \text{ ns}, \chi^2 = 1.03$ | 2.92 ns |
| methylene chloride | $\tau_1 = 2.86 \text{ ns}, \chi^2 = 1.13$                                                   | 2.86 ns | $\tau_1 = 2.93 \text{ ns}, \chi^2 = 1.02$ | 2.93 ns |
| 1,2-dichloroethane | $\tau_1 = 2.78 \text{ ns}, \chi^2 = 1.06$                                                   | 2.78 ns | $\tau_1 = 2.86 \text{ ns}, \chi^2 = 1.09$ | 2.86 ns |
| acetonitrile       | $\tau_1 = 3.13 \text{ ns}, \chi^2 = 1.05$                                                   | 3.13 ns | $\tau_1 = 3.16 \text{ ns}, \chi^2 = 1.08$ | 3.16 ns |

<sup>a</sup>The excited state lifetimes were determined on a HORIBA TEMPRO-01 instrument.

## X. Excited state lifetimes of **1** and **2** in film

**Table S7.** Excited state lifetimes of **1** in doped film (7 wt% in TBCPF)<sup>a</sup>

| Temperature (K) | Enol-form                                                                                   |                   | Keto-form                                                                                   |                   |
|-----------------|---------------------------------------------------------------------------------------------|-------------------|---------------------------------------------------------------------------------------------|-------------------|
|                 | Life time                                                                                   | Average life time | Life time                                                                                   | Average life time |
| 77              | $\tau_1 = 0.32 \text{ ns}, (74\%)$<br>$\tau_2 = 4.51 \text{ ns}, (26\%)$<br>$\chi^2 = 1.04$ | 1.41 ns           | $\tau_1 = 2.42 \text{ ns}, (33\%)$<br>$\tau_2 = 5.08 \text{ ns}, (67\%)$<br>$\chi^2 = 1.17$ | 4.20 ns           |
| 107             | $\tau_1 = 1.43 \text{ ns}, (45\%)$<br>$\tau_2 = 4.85 \text{ ns}, (55\%)$<br>$\chi^2 = 1.02$ | 3.32 ns           | $\tau_1 = 2.86 \text{ ns}, (38\%)$<br>$\tau_2 = 5.36 \text{ ns}, (62\%)$<br>$\chi^2 = 1.04$ | 4.40 ns           |
| 137             | $\tau_1 = 1.42 \text{ ns}, (44\%)$<br>$\tau_2 = 4.89 \text{ ns}, (56\%)$<br>$\chi^2 = 1.03$ | 3.38 ns           | $\tau_1 = 2.85 \text{ ns}, (38\%)$<br>$\tau_2 = 5.38 \text{ ns}, (62\%)$<br>$\chi^2 = 1.02$ | 4.43 ns           |
| 167             | $\tau_1 = 1.52 \text{ ns}, (44\%)$<br>$\tau_2 = 4.93 \text{ ns}, (56\%)$<br>$\chi^2 = 1.05$ | 3.42 ns           | $\tau_1 = 2.93 \text{ ns}, (39\%)$<br>$\tau_2 = 5.41 \text{ ns}, (61\%)$<br>$\chi^2 = 1.19$ | 4.45 ns           |
| 197             | $\tau_1 = 1.47 \text{ ns}, (43\%)$<br>$\tau_2 = 4.89 \text{ ns}, (57\%)$<br>$\chi^2 = 1.12$ | 3.41 ns           | $\tau_1 = 3.03 \text{ ns}, (42\%)$<br>$\tau_2 = 5.46 \text{ ns}, (58\%)$<br>$\chi^2 = 1.08$ | 4.45 ns           |
| 227             | $\tau_1 = 1.43 \text{ ns}, (43\%)$<br>$\tau_2 = 4.87 \text{ ns}, (57\%)$<br>$\chi^2 = 1.11$ | 3.39 ns           | $\tau_1 = 2.79 \text{ ns}, (36\%)$<br>$\tau_2 = 5.28 \text{ ns}, (64\%)$<br>$\chi^2 = 1.11$ | 4.40 ns           |

|     |                                                                           |         |                                                                           |         |
|-----|---------------------------------------------------------------------------|---------|---------------------------------------------------------------------------|---------|
| 257 | $\tau_1 = 1.39$ ns, (42%)<br>$\tau_2 = 4.78$ ns, (58%)<br>$\chi^2 = 1.20$ | 3.36 ns | $\tau_1 = 2.87$ ns, (40%)<br>$\tau_2 = 5.35$ ns, (60%)<br>$\chi^2 = 1.08$ | 4.37 ns |
| 287 | $\tau_1 = 1.40$ ns, (42%)<br>$\tau_2 = 4.78$ ns, (58%)<br>$\chi^2 = 1.17$ | 3.35 ns | $\tau_1 = 2.68$ ns, (38%)<br>$\tau_2 = 5.20$ ns, (62%)<br>$\chi^2 = 1.01$ | 4.24 ns |
| 317 | $\tau_1 = 1.22$ ns, (43%)<br>$\tau_2 = 4.57$ ns, (57%)<br>$\chi^2 = 1.21$ | 3.13 ns | $\tau_1 = 2.67$ ns, (40%)<br>$\tau_2 = 5.16$ ns, (60%)<br>$\chi^2 = 1.10$ | 4.17 ns |

<sup>a</sup>The excited state lifetimes were determined on a HORIBA TEMPRO-01 instrument.

**Table S8.** Excited state lifetimes of **2** in doped film (2 wt% in CBZ<sub>2</sub>-F<sub>1</sub>)<sup>a</sup>

| Temperature (K) | Enol-form                                                                 |                   | Keto-form                                                                 |                   |
|-----------------|---------------------------------------------------------------------------|-------------------|---------------------------------------------------------------------------|-------------------|
|                 | Life time                                                                 | Average life time | Life time                                                                 | Average life time |
| 77              | $\tau_1 = 1.12$ ns, (79%)<br>$\tau_2 = 3.02$ ns, (21%)<br>$\chi^2 = 1.16$ | 1.53 ns           | $\tau_1 = 2.00$ ns, (61%)<br>$\tau_2 = 4.49$ ns, (39%)<br>$\chi^2 = 1.01$ | 2.96 ns           |
| 107             | $\tau_1 = 1.06$ ns, (80%)<br>$\tau_2 = 3.05$ ns, (20%)<br>$\chi^2 = 1.19$ | 1.45 ns           | $\tau_1 = 1.86$ ns, (60%)<br>$\tau_2 = 4.48$ ns, (40%)<br>$\chi^2 = 1.17$ | 2.91 ns           |
| 137             | $\tau_1 = 1.06$ ns, (81%)<br>$\tau_2 = 3.11$ ns, (19%)<br>$\chi^2 = 0.98$ | 1.44 ns           | $\tau_1 = 1.84$ ns, (59%)<br>$\tau_2 = 4.50$ ns, (41%)<br>$\chi^2 = 1.26$ | 2.92 ns           |
| 167             | $\tau_1 = 1.05$ ns, (81%)<br>$\tau_2 = 3.05$ ns, (19%)<br>$\chi^2 = 1.00$ | 1.43 ns           | $\tau_1 = 1.91$ ns, (60%)<br>$\tau_2 = 4.53$ ns, (40%)<br>$\chi^2 = 1.17$ | 2.95 ns           |
| 197             | $\tau_1 = 1.02$ ns, (80%)<br>$\tau_2 = 3.00$ ns, (20%)<br>$\chi^2 = 1.17$ | 1.41 ns           | $\tau_1 = 1.93$ ns, (62%)<br>$\tau_2 = 4.56$ ns, (38%)<br>$\chi^2 = 1.05$ | 2.94 ns           |
| 227             | $\tau_1 = 1.08$ ns, (80%)<br>$\tau_2 = 3.05$ ns, (20%)<br>$\chi^2 = 1.02$ | 1.47 ns           | $\tau_1 = 1.90$ ns, (62%)<br>$\tau_2 = 4.51$ ns, (38%)<br>$\chi^2 = 1.06$ | 2.90 ns           |
| 257             | $\tau_1 = 1.06$ ns, (80%)<br>$\tau_2 = 3.04$ ns, (20%)<br>$\chi^2 = 1.03$ | 1.46 ns           | $\tau_1 = 1.88$ ns, (62%)<br>$\tau_2 = 4.41$ ns, (38%)<br>$\chi^2 = 1.05$ | 2.85 ns           |
| 287             | $\tau_1 = 1.08$ ns, (79%)<br>$\tau_2 = 3.01$ ns, (21%)<br>$\chi^2 = 1.04$ | 1.49 ns           | $\tau_1 = 1.82$ ns, (62%)<br>$\tau_2 = 4.35$ ns, (38%)<br>$\chi^2 = 1.16$ | 2.78 ns           |
| 300             | $\tau_1 = 1.05$ ns, (77%)<br>$\tau_2 = 2.93$ ns, (23%)<br>$\chi^2 = 1.10$ | 1.48 ns           | $\tau_1 = 1.80$ ns, (62%)<br>$\tau_2 = 4.21$ ns, (38%)<br>$\chi^2 = 1.04$ | 2.72 ns           |

<sup>a</sup>The excited state lifetimes were determined on a HORIBA TEMPRO-01 instrument.

## XI. Solvatochromic effect of **1** and **2**

Solvent-dependent spectral shifts are often interpreted in terms of the Lippert–Mataga equation (S1a),<sup>4,5</sup> which describes the solvatochromic Stokes shift  $\Delta\nu$  (between the maxima

of absorption and fluorescence emission, and expressed in wavenumbers) as a function of the dipole moment change ( $\Delta\mu = \mu_e - \mu_g$ ) of the dye upon excitation:

$$\Delta\nu = \nu_{abs} - \nu_{em} = \frac{2\Delta f}{hca^3}(\mu_e - \mu_g)^2 + const \quad (S1a)$$

In eq. S1a,  $h$  is Planck's constant,  $c$  is the velocity of light, and  $a$  is the Onsager cavity radius. The Onsager cavity radius ( $a$ ) is estimated from quantumchemical calculations by using density functional theory method under the B3LYP/6-31g\* level.<sup>5,6</sup> The Onsager radius **1** and **2** are calculated to be 4.48 Å and 6.03 Å as the effective radius.  $\mu_g$  and  $\mu_e$  denote the dipole moments of the dye in ground and excited states, respectively. The  $\mu_g$  can be estimated at the level of wB97X/6-311+g(d, p) level with the Gaussian 09 package.<sup>7</sup> The orientational polarizability of solvent ( $\Delta f$ ) can be calculated from the dielectric constants  $\varepsilon$  and the refractive indices  $n$  of the solvent using the following equation (S1b).

$$\Delta f = \frac{\varepsilon - 1}{2\varepsilon + 1} - \frac{n^2 - 1}{2n^2 + 1} \quad (S1b)$$

The dipole moment change ( $\Delta\mu$ ) was obtained from the solvatochromic shift in various solvents based on eq. S1a and S1b. The enol-form of **1** and **2** displayed a good linear correlation between Stokes shift ( $\nu_a - \nu_f$ ) and solvent polarity manifests ( $f$ ), which show only one slope value of 7008 ( $r = 0.99$ ) and 10577 ( $r = 0.98$ ), respectively. The dipole moment change of **1** and **2** between the enol-form excited state and ground state ( $\Delta\mu = \mu_e - \mu_g$ ), which can serve as an empirical scale to evaluate the strength of the intramolecular charge transfer (ICT),<sup>5</sup> was calculated to be 8.0 D and 15.2 D and the corresponding  $\mu_e$  were thus estimated to be 11.9 D and 18.9 D, respectively.

**Table S9.** Photophysical properties of **1** in different solvents<sup>a</sup>

| Solvent | $\Delta f$ | <b>1</b>        |                     |                 |                     |                 | $\Phi_f(\%)$ |
|---------|------------|-----------------|---------------------|-----------------|---------------------|-----------------|--------------|
|         |            | $\lambda_{abs}$ | $\lambda_{em-enol}$ | $\nu_a - \nu_f$ | $\lambda_{em-keto}$ | $\nu_a - \nu_f$ |              |

|                    |        | (nm) | (nm) | (cm <sup>-1</sup> ) | (nm) | (cm <sup>-1</sup> ) |      |
|--------------------|--------|------|------|---------------------|------|---------------------|------|
| cyclohexane        | 0.0033 | 319  | 429  | 8038                | 526  | 12336               | 14.1 |
| benzene            | 0.0026 | 321  | 433  | 8058                | 533  | 12391               | 24.2 |
| toluene            | 0.014  | 321  | 434  | 8111                | 532  | 12356               | 26.3 |
| dioxane            | 0.021  | 320  | 433  | 8155                | 533  | 12488               | 22.7 |
| butyl ether        | 0.096  | 316  | 434  | 8604                | 530  | 12778               | 22.3 |
| chlorobenzene      | 0.143  | 321  | 453  | 9078                | 535  | 12461               | 22.5 |
| chloroform         | 0.149  | 319  | 450  | 9126                | 533  | 12586               | 23.7 |
| ethyl acetate      | 0.200  | 319  | 455  | 9369                | 533  | 12586               | 19.9 |
| tetrahydrofuran    | 0.210  | 321  | 460  | 9414                | 535  | 12461               | 18.2 |
| methylene chloride | 0.217  | 321  | 463  | 9558                | 530  | 12285               | 27.4 |
| 1,2-dichloroethane | 0.222  | 320  | 464  | 9698                | 534  | 12523               | 18.7 |

<sup>a</sup> $\lambda_{\text{abs}}$  = absorption maximum,  $\lambda_{\text{em-enol}}$  = enol-form emission,  $\lambda_{\text{em-keto}}$  = keto-form emission, and  $\Phi_f$  = fluorescence absolute quantum yield.

**Table S10.** Photophysical properties of **2** in different solvents<sup>a</sup>

| Solvent            | $\Delta f$ | <b>2</b>                       |                                    |                                        |                                    |                                        | $\Phi_f(\%)$ |
|--------------------|------------|--------------------------------|------------------------------------|----------------------------------------|------------------------------------|----------------------------------------|--------------|
|                    |            | $\lambda_{\text{abs}}$<br>(nm) | $\lambda_{\text{em-enol}}$<br>(nm) | $\nu_a - \nu_f$<br>(cm <sup>-1</sup> ) | $\lambda_{\text{em-keto}}$<br>(nm) | $\nu_a - \nu_f$<br>(cm <sup>-1</sup> ) |              |
| cyclohexane        | 0.0033     | 369                            | 412                                | 2828                                   | 538                                | 8513                                   | 47.6         |
| hexane             | 0.0012     | 371                            | 413                                | 2741                                   | 541                                | 8470                                   | 47.1         |
| benzene            | 0.0026     | 370                            | 421                                | 3274                                   | 547                                | 8745                                   | 50.9         |
| dioxane            | 0.021      | 372                            | 426                                | 3408                                   | 548                                | 8634                                   | 41.5         |
| butyl ether        | 0.096      | 371                            | 429                                | 3664                                   | 546                                | 8639                                   | 37.6         |
| chlorobenzene      | 0.143      | 372                            | 442                                | 4257                                   | 546                                | 8567                                   | 64.1         |
| chloroform         | 0.149      | 373                            | 444                                | 4287                                   | 547                                | 8528                                   | 41.0         |
| ethyl acetate      | 0.200      | 371                            | 452                                | 4830                                   | 547                                | 8673                                   | 37.1         |
| tetrahydrofuran    | 0.210      | 369                            | 457                                | 5218                                   | 547                                | 8819                                   | 44.5         |
| methylene chloride | 0.217      | 372                            | 465                                | 5376                                   | 545                                | 8533                                   | 52.3         |
| 1,2-dichloroethane | 0.222      | 371                            | 468                                | 5586                                   | 543                                | 8538                                   | 51.9         |
| acetonitrile       | 0.305      | 372                            | 480                                | 6048                                   | 540                                | 8363                                   | 40.2         |

<sup>a</sup> $\lambda_{\text{abs}}$  = absorption maximum,  $\lambda_{\text{em-enol}}$  = enol-form emission,  $\lambda_{\text{em-keto}}$  = keto-form emission, and  $\Phi_f$  = fluorescence absolute quantum yield.

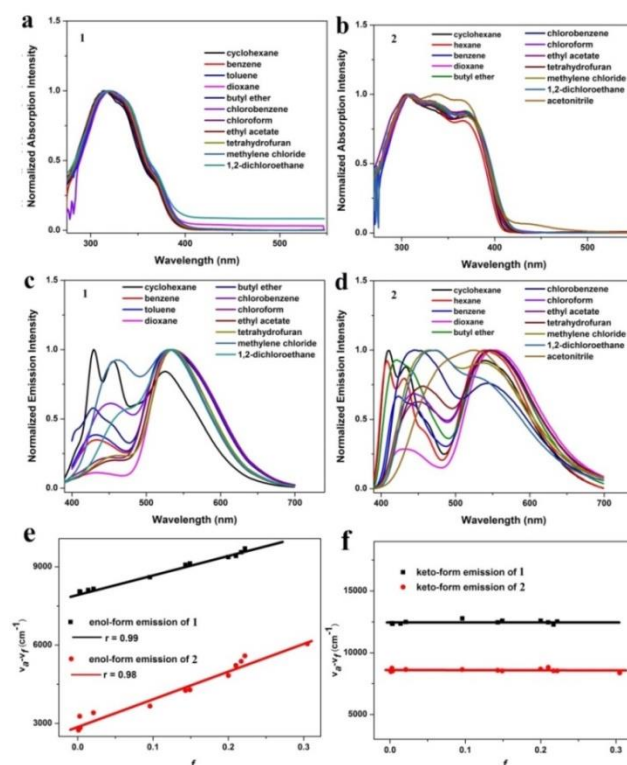

**Fig. S13** (a) Normalized absorption spectra of **1** in different solvents (concentration:  $5 \times 10^{-5}$  mol L $^{-1}$ ). (b) Normalized absorption spectra of **2** in different solvents (concentration:  $5 \times 10^{-5}$  mol L $^{-1}$ ). (c) Normalized emission spectra of **1** in different solvents (concentration:  $5 \times 10^{-5}$  mol L $^{-1}$ ). (d) Normalized emission spectra of **2** in different solvents (concentration:  $5 \times 10^{-5}$  mol L $^{-1}$ ). (e) and (f) Linear fitting of Lippert–Mataga model ( $f$ : orientation polarization of solvent media;  $\nu_a - \nu_f$ : Stokes shift of enol-form and keto-form of **1** and **2** in different solvent).

## XII. Calculated energy landscape and natural transition orbitals (NTOs) of the singlet and triplet states for **1** and **2**

The ground-state geometries were optimized under the B3LYP/6-311+G(d, p) level. Based on the optimized ground state configuration, the high excitation energy levels of singlet and triplet states were evaluated using the TD-M06-2X/6-311+G(d, p) method. In order to examine the character of excited-states, natural transition orbitals (NTOs) were evaluated for the first five excited-states, involving both singlet and triplet states. This approach provides the most compact representation of the electronic transitions in terms of an expansion into single particle orbitals by diagonalizing the transition density matrix associated with each excitation. All calculations were performed using the Gaussian 09 program package.<sup>7</sup>

**Table S11.** Energy level and oscillator strengths of **1**

| Excited States | S energy level (eV) | T energy level (eV) | S Oscillator Strength |
|----------------|---------------------|---------------------|-----------------------|
| 1              | 3.707               | 2.825               | 1.112                 |
| 2              | 3.995               | 3.237               | 0.734                 |
| 3              | 4.081               | 3.415               | 0.146                 |
| 4              | 4.156               | 3.545               | 0.343                 |
| 5              | 4.276               | 3.715               | 0.302                 |
| 6              | 4.356               | 3.767               | 0.038                 |
| 7              | 4.407               | 3.976               | 0.027                 |
| 8              | 4.630               | 4.154               | 0.004                 |
| 9              | 4.658               | 4.233               | 0.052                 |
| 10             | 4.671               | 4.318               | 0.002                 |

**Table S12.** Energy level and oscillator strengths of **2**

| Excited States | S energy level (eV) | T energy level (eV) | S Oscillator Strength |
|----------------|---------------------|---------------------|-----------------------|
| 1              | 3.544               | 2.769               | 1.769                 |
| 2              | 3.927               | 3.168               | 0.054                 |
| 3              | 4.000               | 3.300               | 0.836                 |
| 4              | 4.087               | 3.512               | 0.050                 |
| 5              | 4.096               | 3.539               | 0.030                 |
| 6              | 4.162               | 3.568               | 0.152                 |
| 7              | 4.257               | 3.718               | 0.210                 |
| 8              | 4.278               | 3.736               | 0.338                 |
| 9              | 4.294               | 3.775               | 0.008                 |
| 10             | 4.328               | 3.999               | 0.010                 |

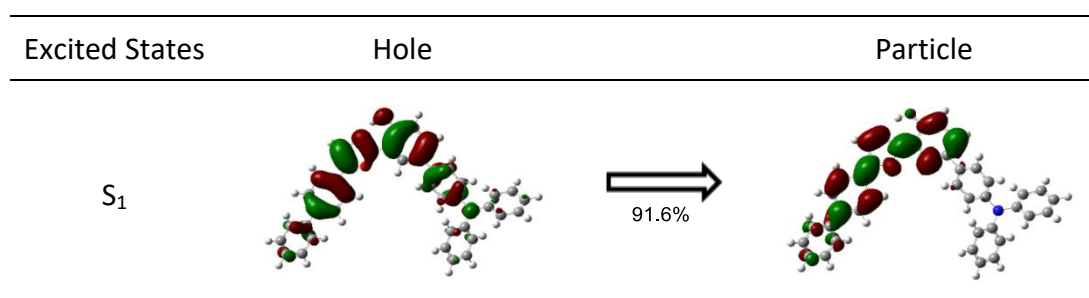

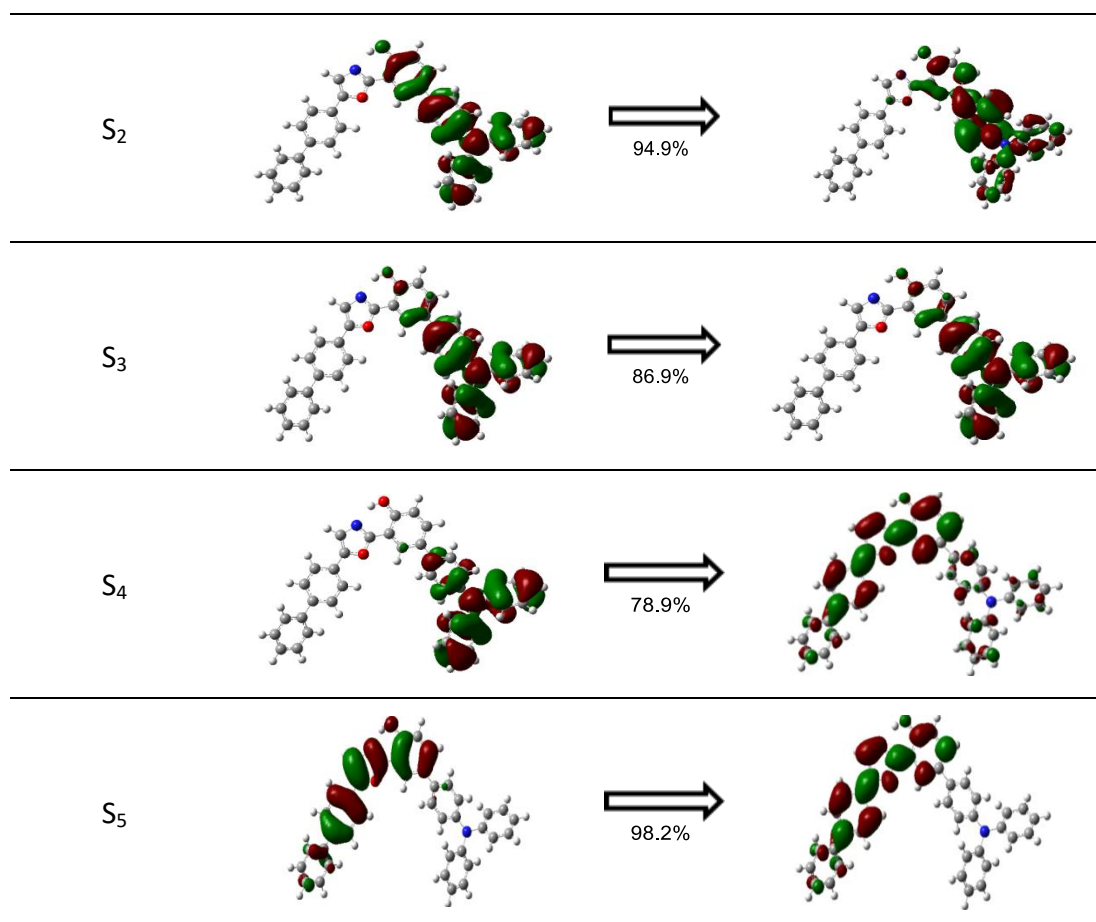

**Fig. S14** Natural transition orbitals of singlet excited states ( $S_1$  to  $S_5$ ) of **1**.

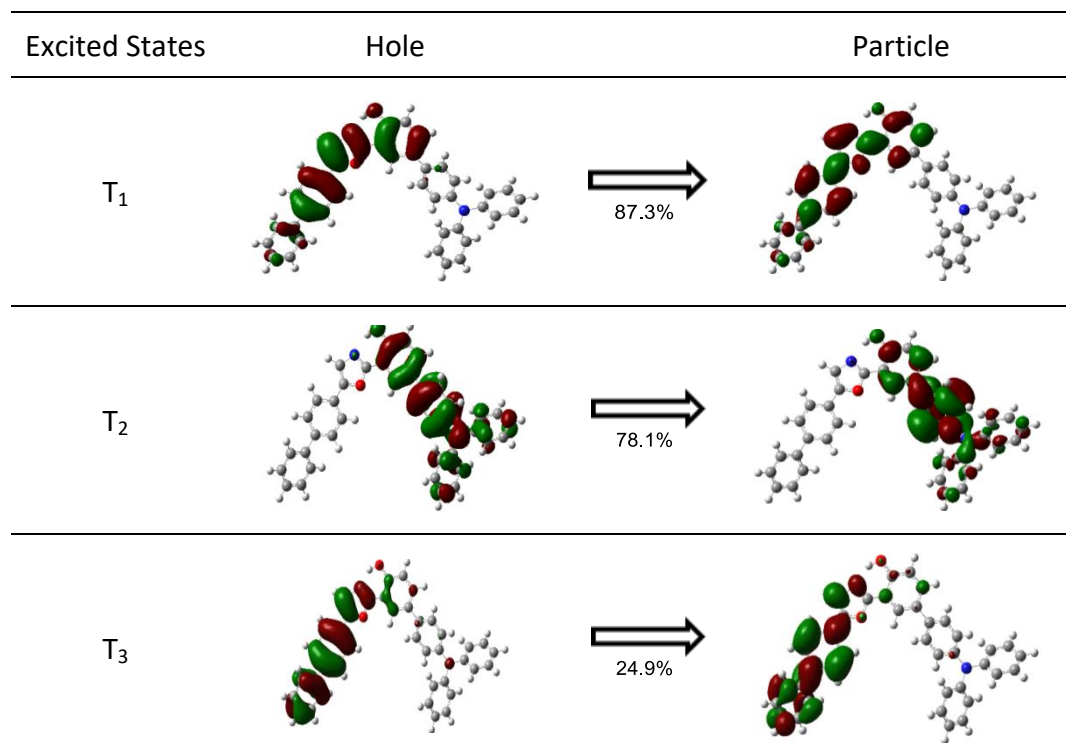

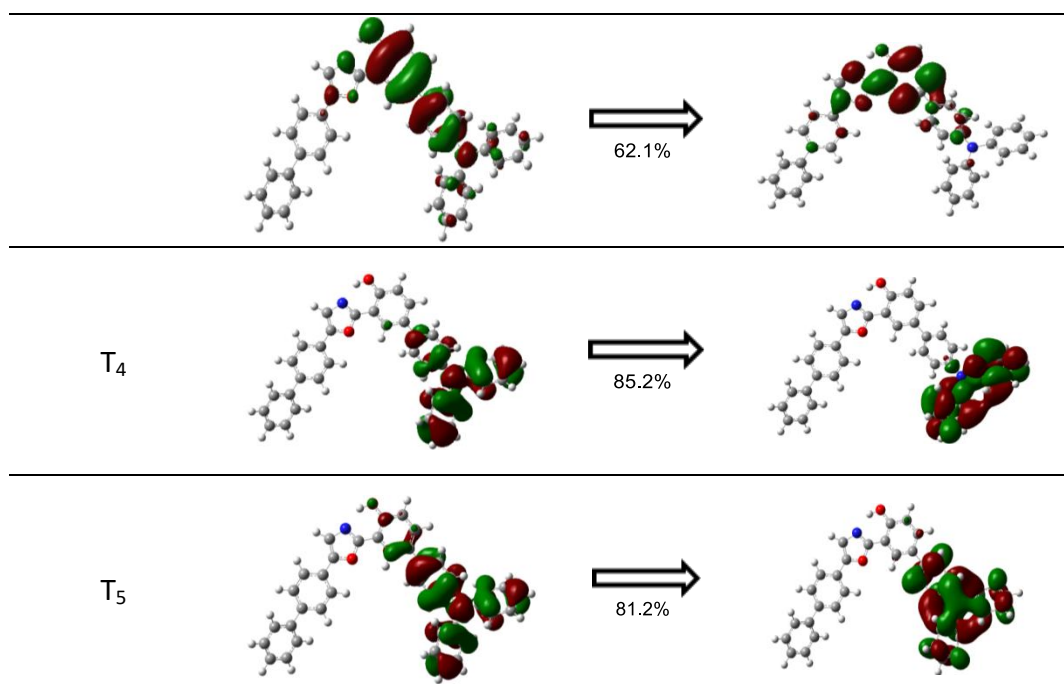

**Fig. S15** Natural transition orbitals of triplet excited states ( $T_1$  to  $T_5$ ) of **1**.

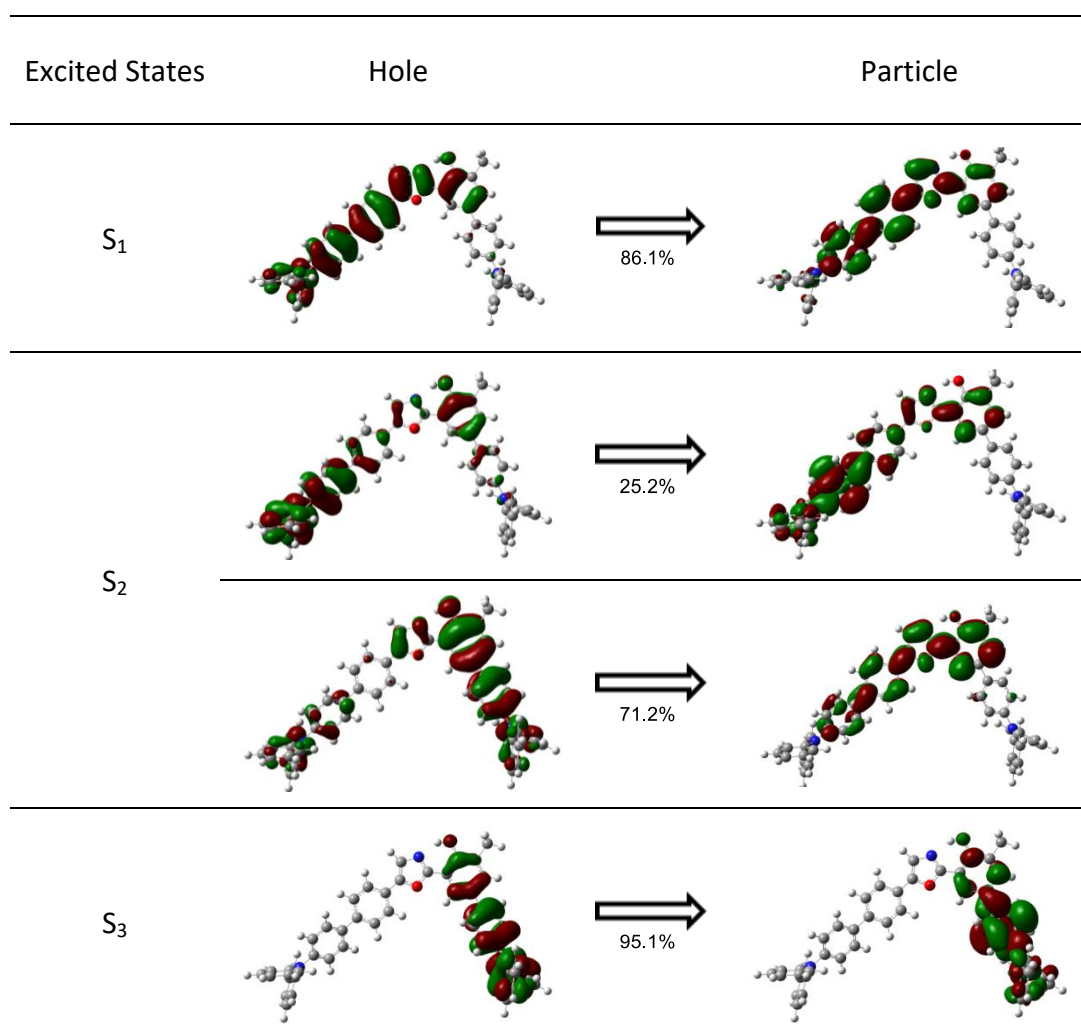

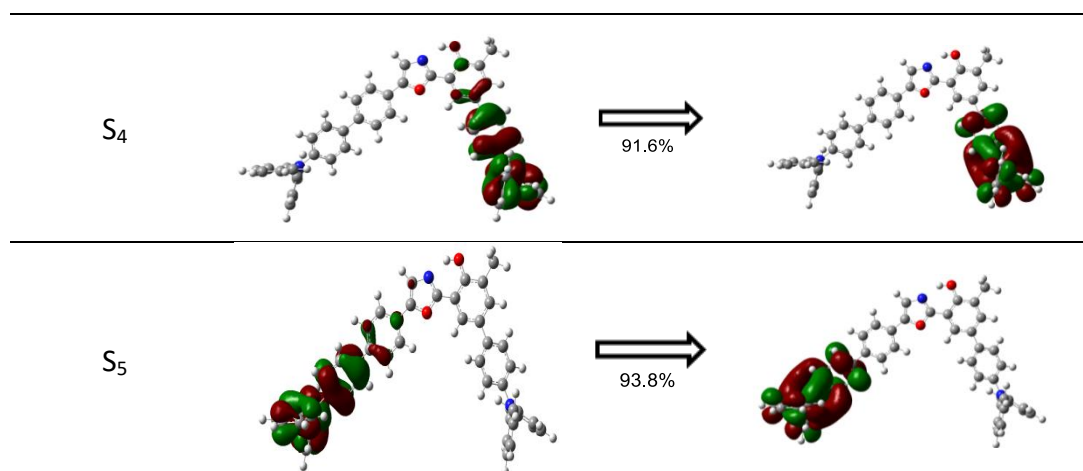

**Fig. S16** Natural transition orbitals of singlet excited states ( $S_1$  to  $S_5$ ) of **2**.

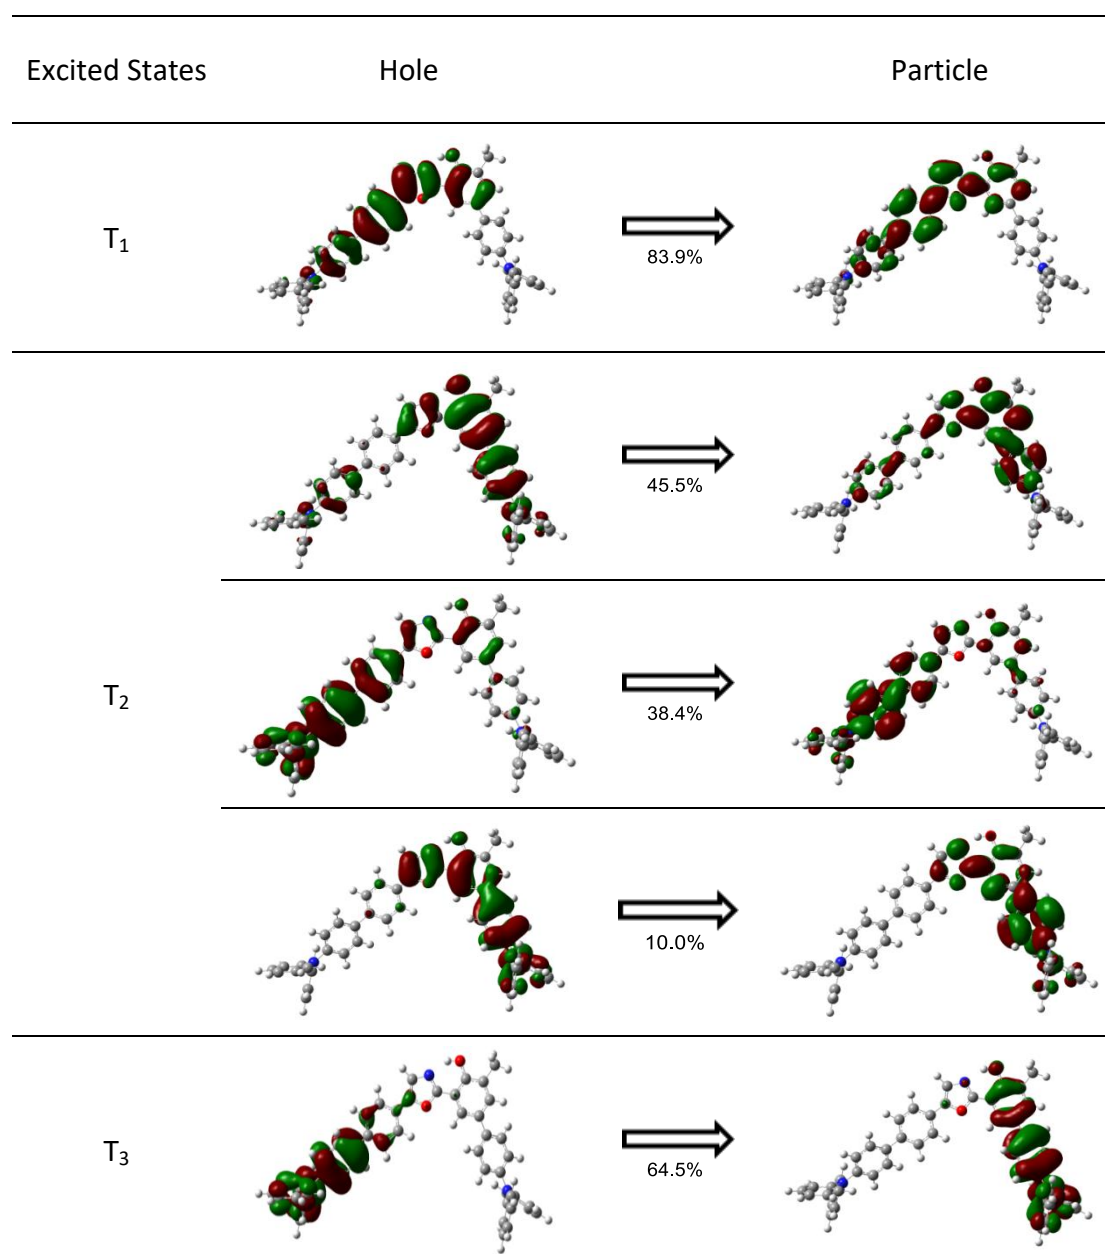

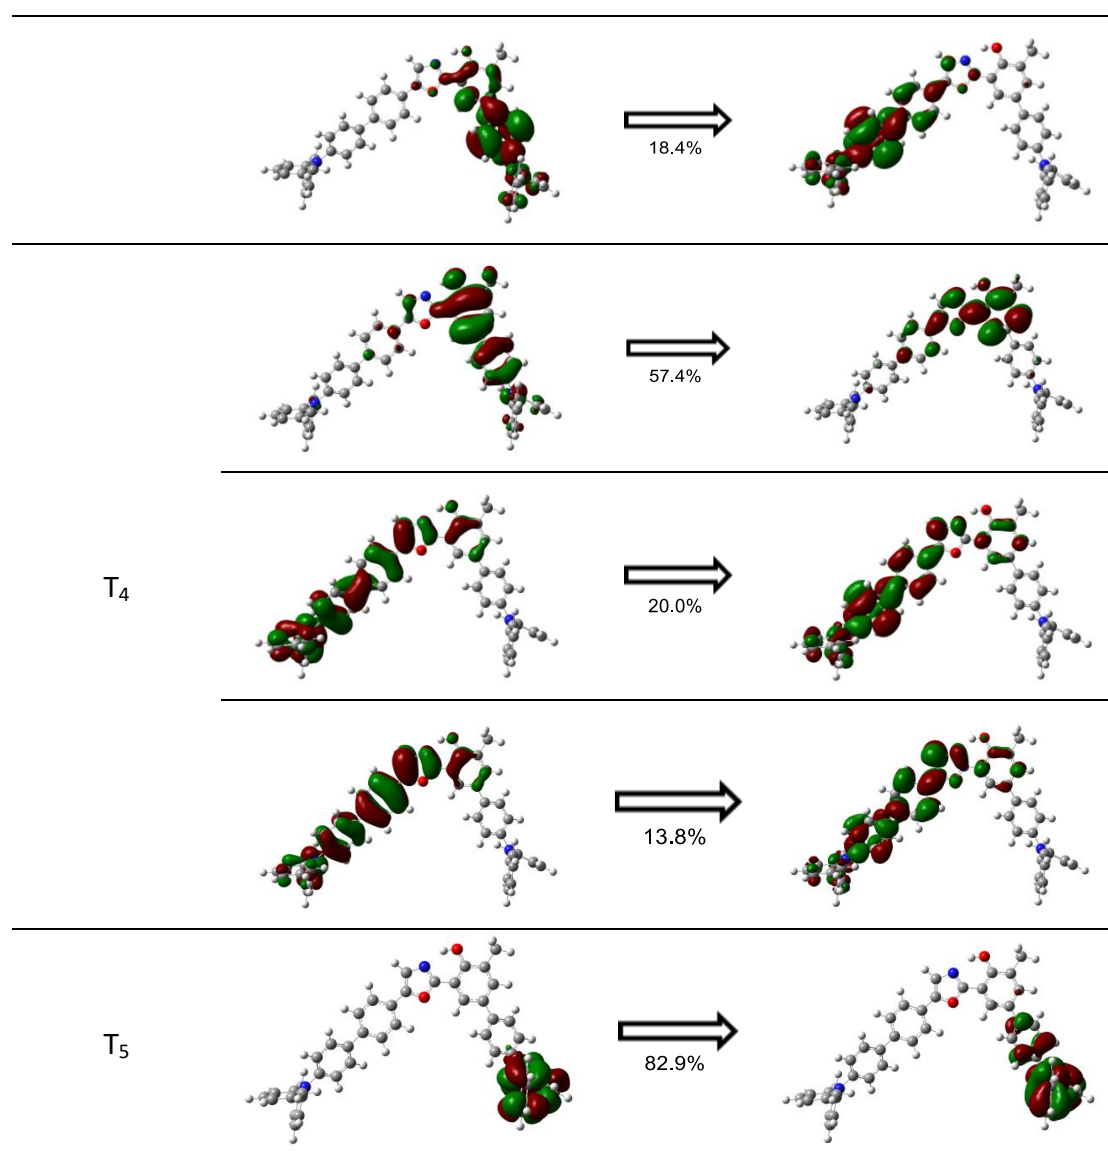

**Fig. S17** Natural transition orbitals of triplet excited states ( $T_1$  to  $T_5$ ) of **2**.

### XIII. References

- 1 (a) Y. Tamura, J. Minamikawa, K. Sumoto, S. Fujii and M. Ikeda, *J. Org. Chem.* 1973, **38**, 1239; (b) C. R. Johnson, R. A. Kirchhoff and H. G. Corkins, *J. Org. Chem.* 1974, **39**, 2458; (c) W. A. Wasylenko, N. Kebede, B. M. Showalter, N. Matsunaga, A. P. Miceli, Y. Liu, L. R. Ryzhkov, C. M. Hadad and J. P. Toscano, *J. Am. Chem. Soc.* 2006, **128**, 13142; (d) G. J. L. Bernardes, J. M. Chalker, J. C. Errey and B. G. Davis, *J. Am. Chem. Soc.* 2008, **130**, 5052.
- 2 J. Lee, K. Shizu, H. Tanaka, H. Nakanotani, T. Yasuda, H. Kaji and C. Adachi, *J. Mater. Chem. C*, 2015, **3**, 2175.
- 3 (a) Y. Endo, K. Shudo and T. Okamoto, *Synthesis* 1980, 461; (b) B. Li, J. Lan, D. Wu and J. You, *Angew. Chem. Int. Ed.* 2015, **54**, 14008.
- 4 (a) N. Mataga, Y. Kaifu and M. Koizumi, *Bull. Chem. Soc. Jpn.* 1956, **29**, 465; (b) V. E. Lippert, *Elektrochem.* 1957, **61**, 962.
- 5 M. Jia, X. Ma, L. Yan, H. Wang, Q. Guo, X. Wang, Y. Wang, X. Zhan and A. Xia, *J. Phys. Chem. A.*, 2010, **114**, 7345.
- 6 (a) J. Karpiuk, *J. Phys. Chem. A* 2004, **108**, 11183; (b) Y. Gong, X. Guo, S. Wang, H. Su, A. Xia, Q. He and F. Bai, *J. Phys. Chem. A* 2007, **111**, 5806.
- 7 M. J. Frisch, G. W. Trucks, H. B. Schlegel, G. E. Scuseria, M. A. Robb , J. R. Cheeseman, G. Scalmani, V. Barone, B. Mennucci , G. A. Petersson, H. Nakatsuji, M. Caricato, X. Li, H. P. Hratchian, A. F. Izmaylov, J. Bloino, G. Zheng, J. L. Sonnenberg, M. Hada, M. Ehara, K. Toyota, R. Fukuda, J. Hasegawa, M. Ishida, T. Nakajima, Y. Honda, O. Kitao, H. Nakai, T. Vreven, J. A. Montgomery, Jr., J. E. Peralta, F. Ogliaro, M. Bearpark, J. J. Heyd, E. Brothers, K. N. Kudin, V. N. Staroverov, R. Kobayashi, J. Normand, K. Raghavachari, A. Rendell, J. C. Burant, S. S. Iyengar, J. Tomasi, M. Cossi, N. Rega, J. M. Millam, M. Klene, J. E. Knox, J. B. Cross, V. Bakken, C. Adamo, J. Jaramillo, R. Gomperts, R. E. Stratmann, O. Yazyev, A. J. Austin, R. Cammi, C. Pomelli, J. W. Ochterski, R. L. Martin, K. Morokuma, V. G. Zakrzewski, G. A. Voth, P. Salvador, J. J. Dannenberg, S. Dapprich, A. D. Daniels, O. Farkas, J. B. Foresman, J. V. Ortiz, J. Cioslowski and A. D. J. Fox, Gaussian 09, Revision A.02 , Gaussian Inc., Wallingford, CT, 2009.

# XIV. Copies of $^1\text{H}$ and $^{13}\text{C}$ NMR spectra

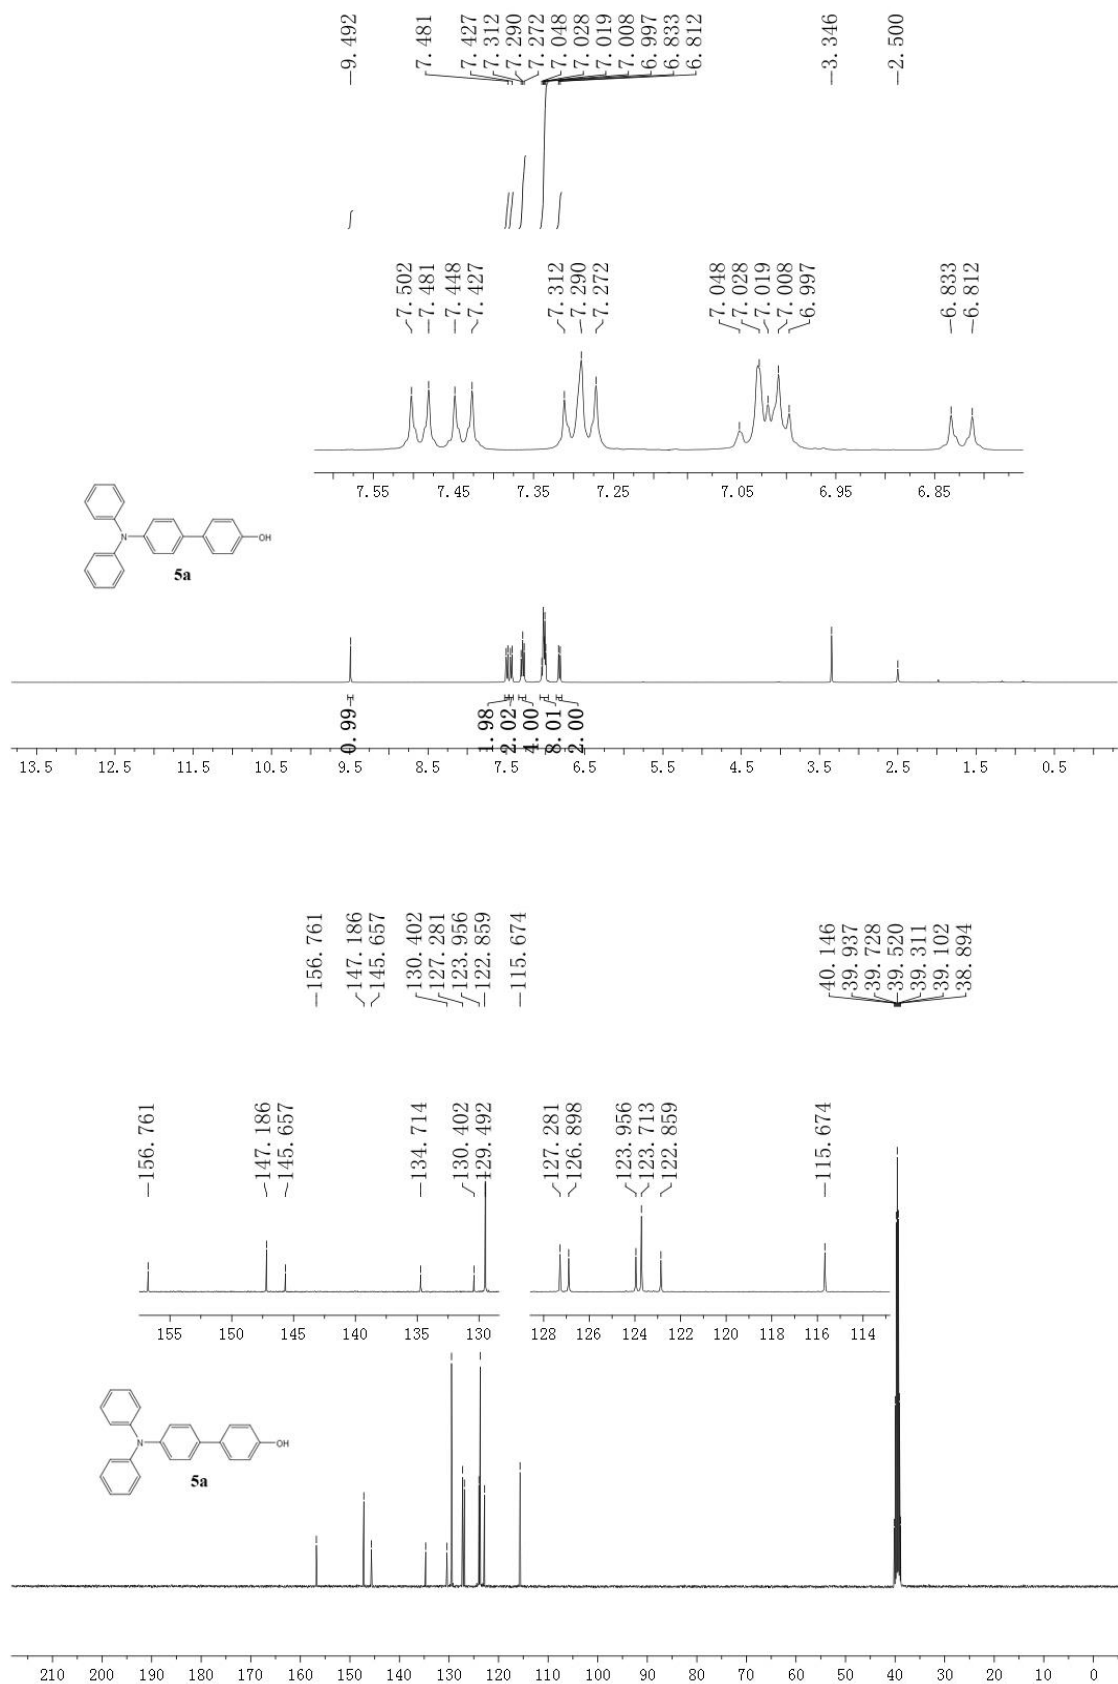

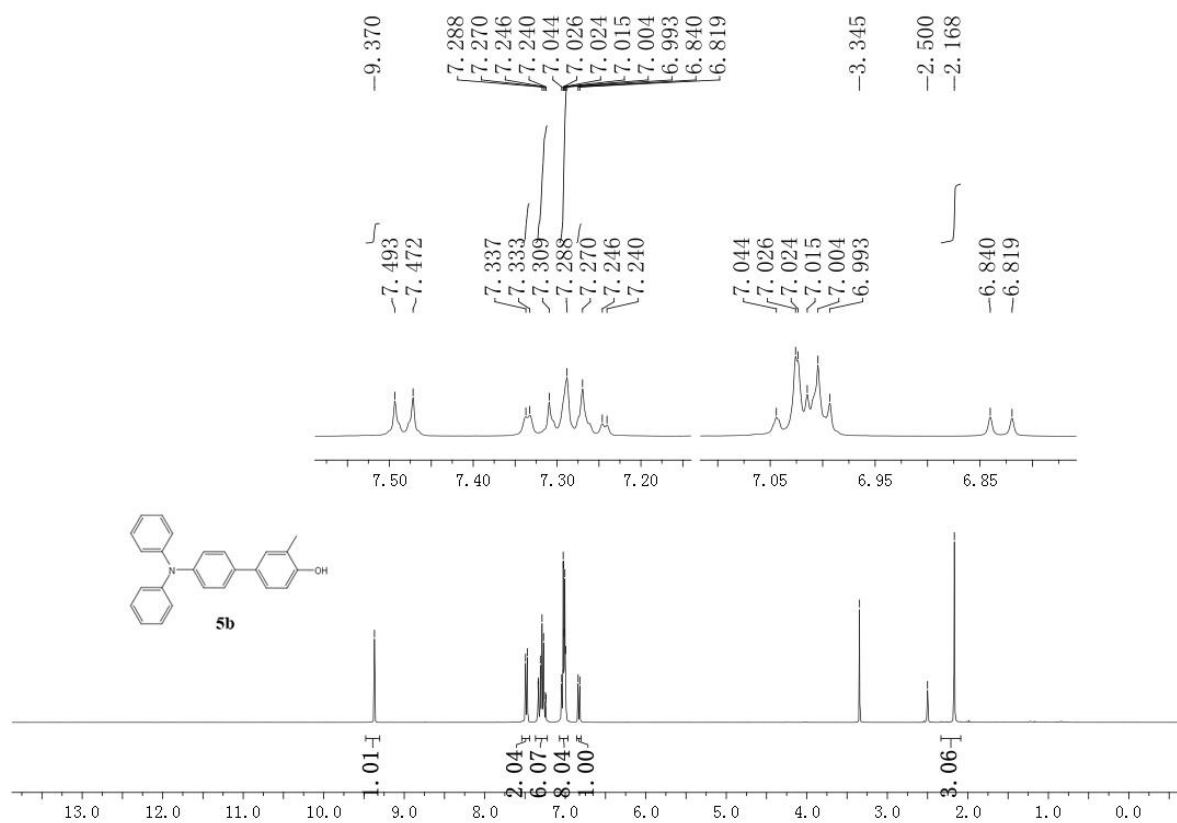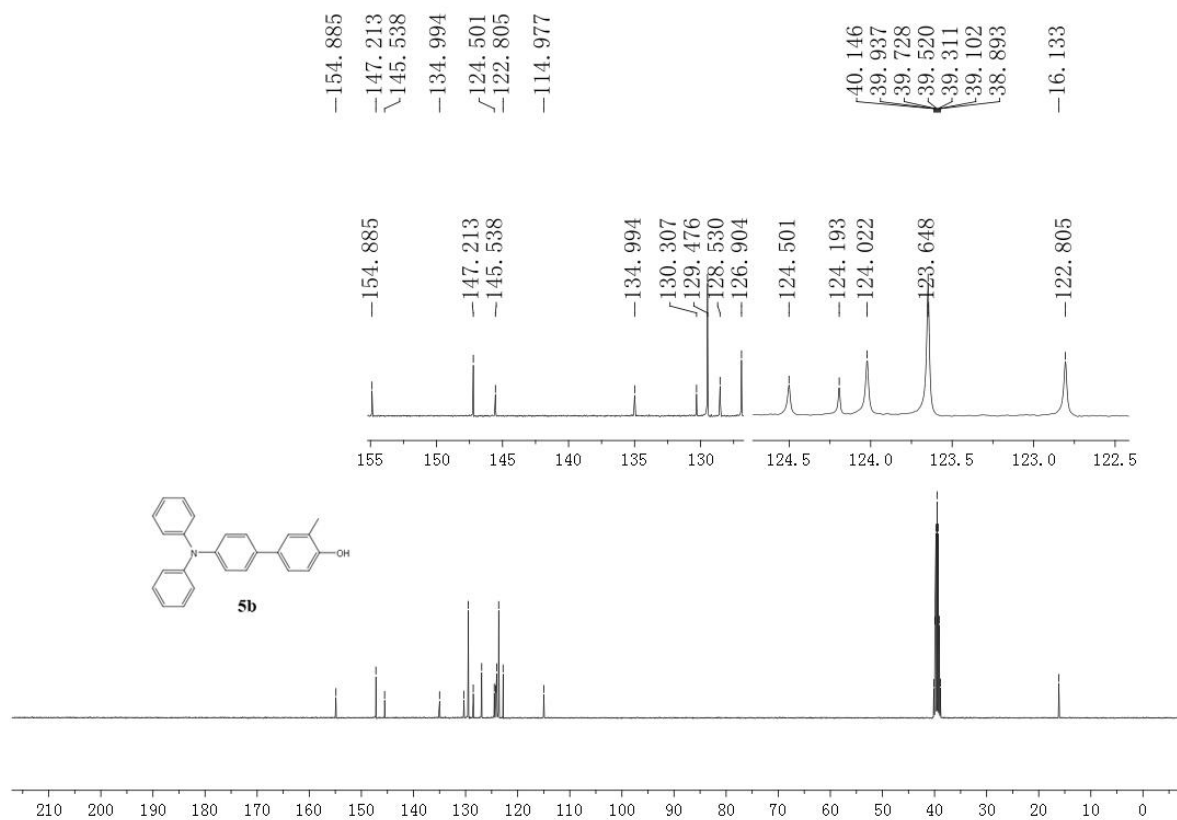

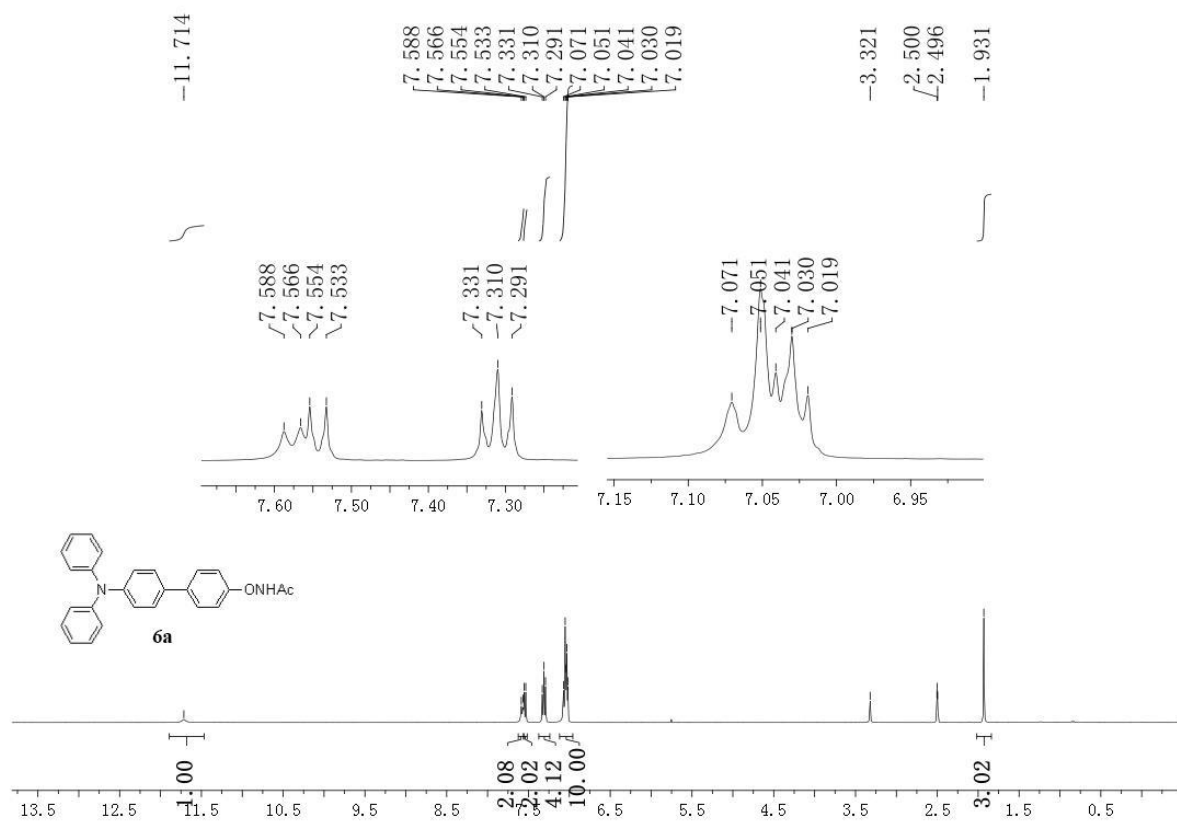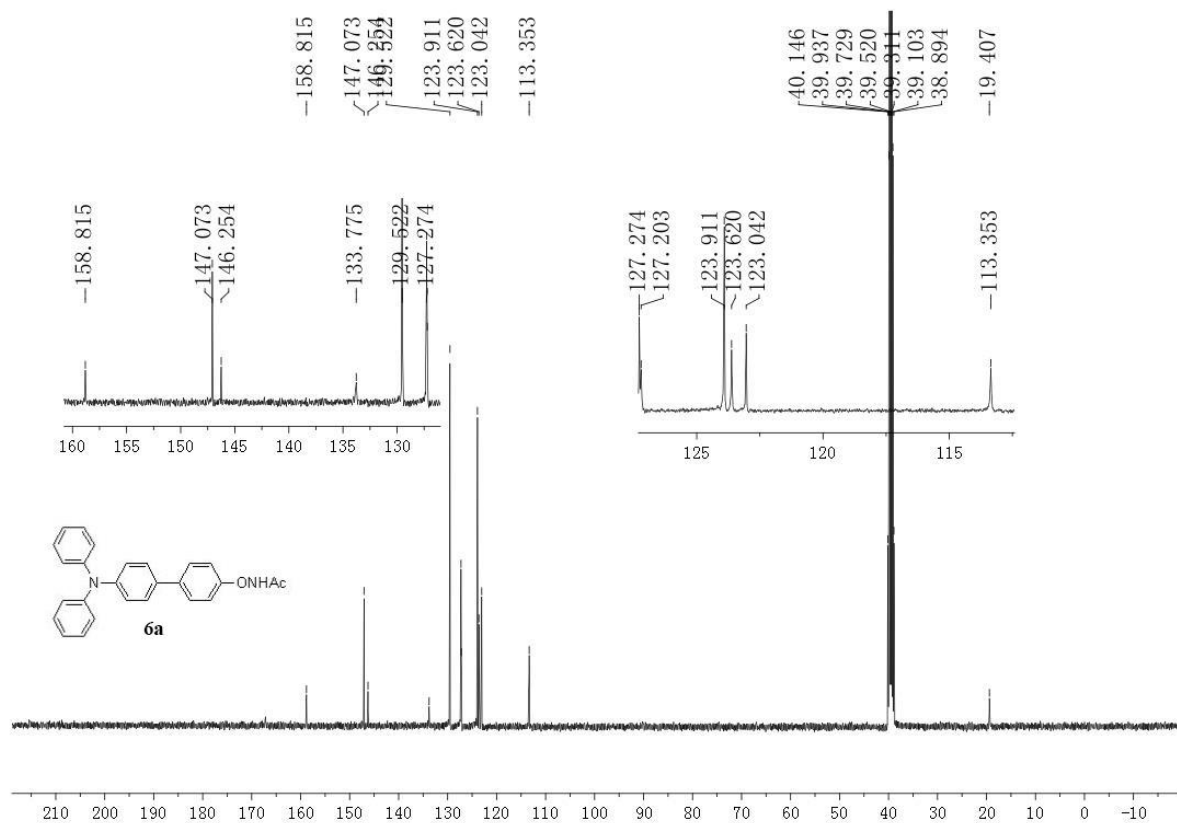

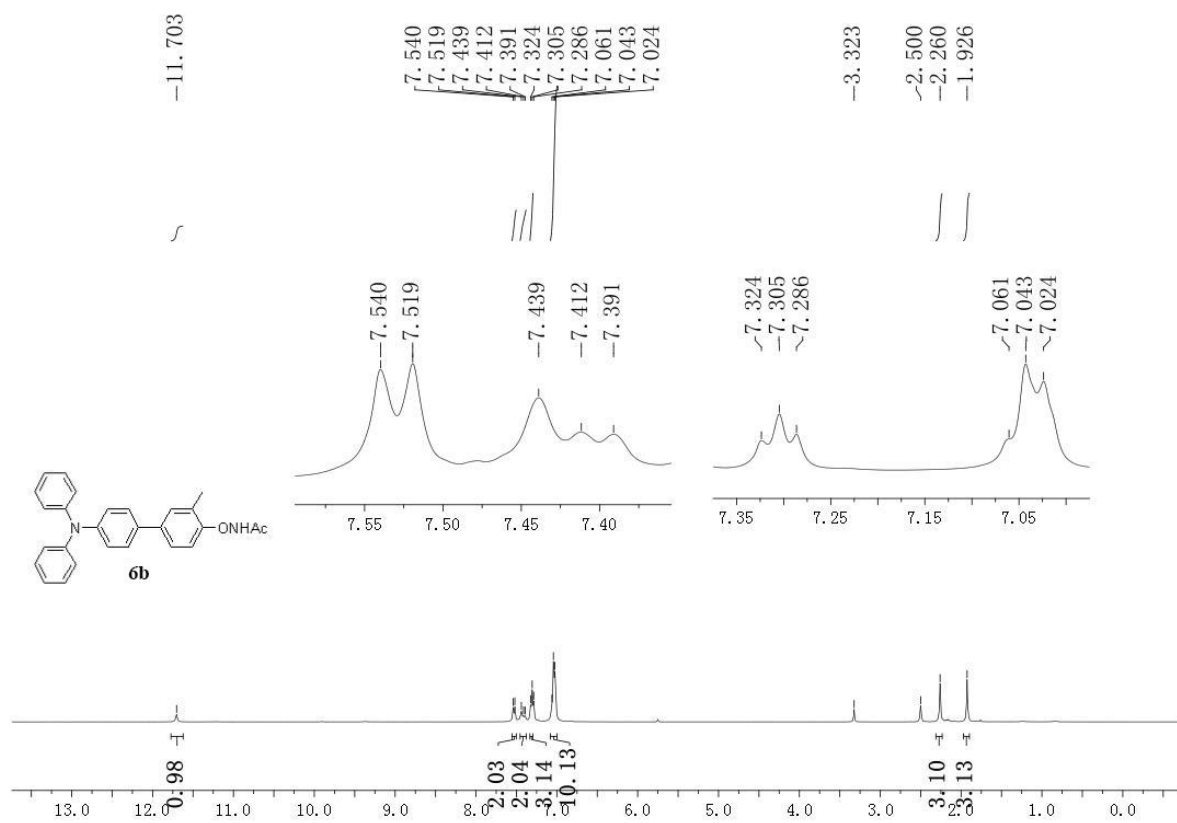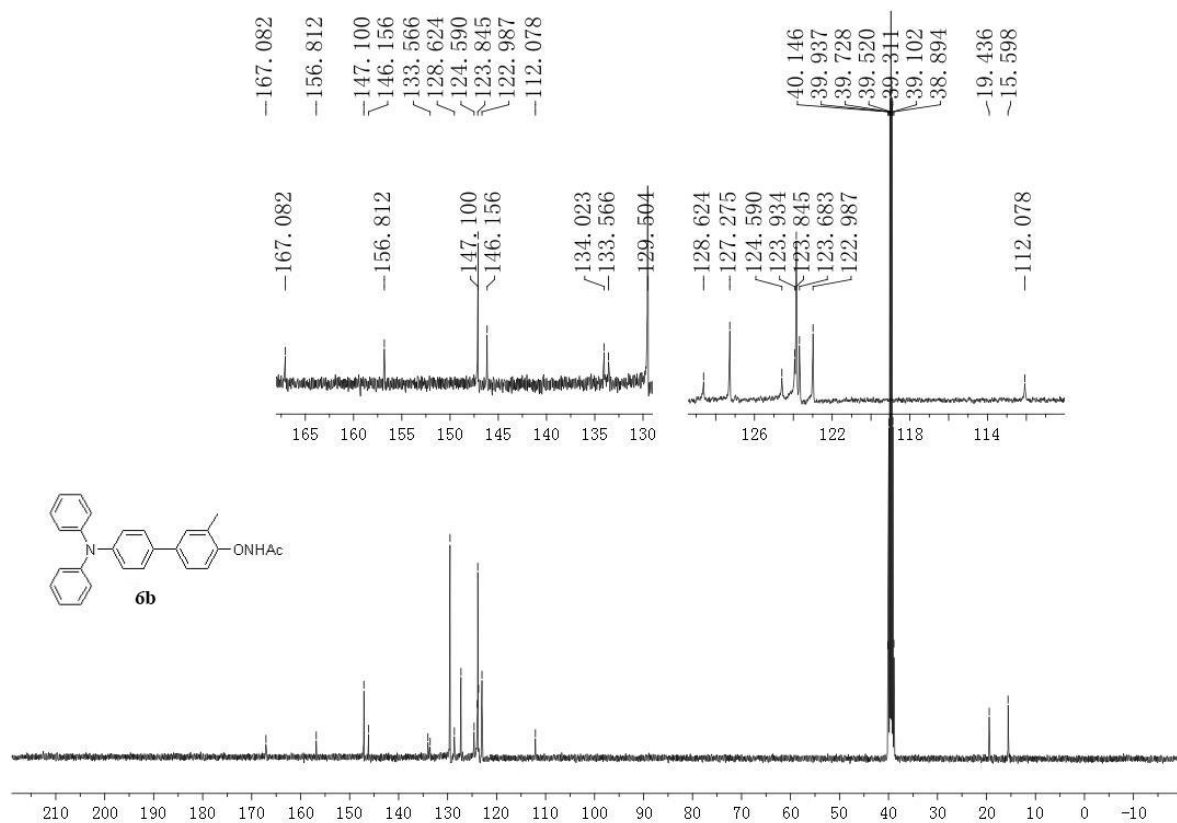

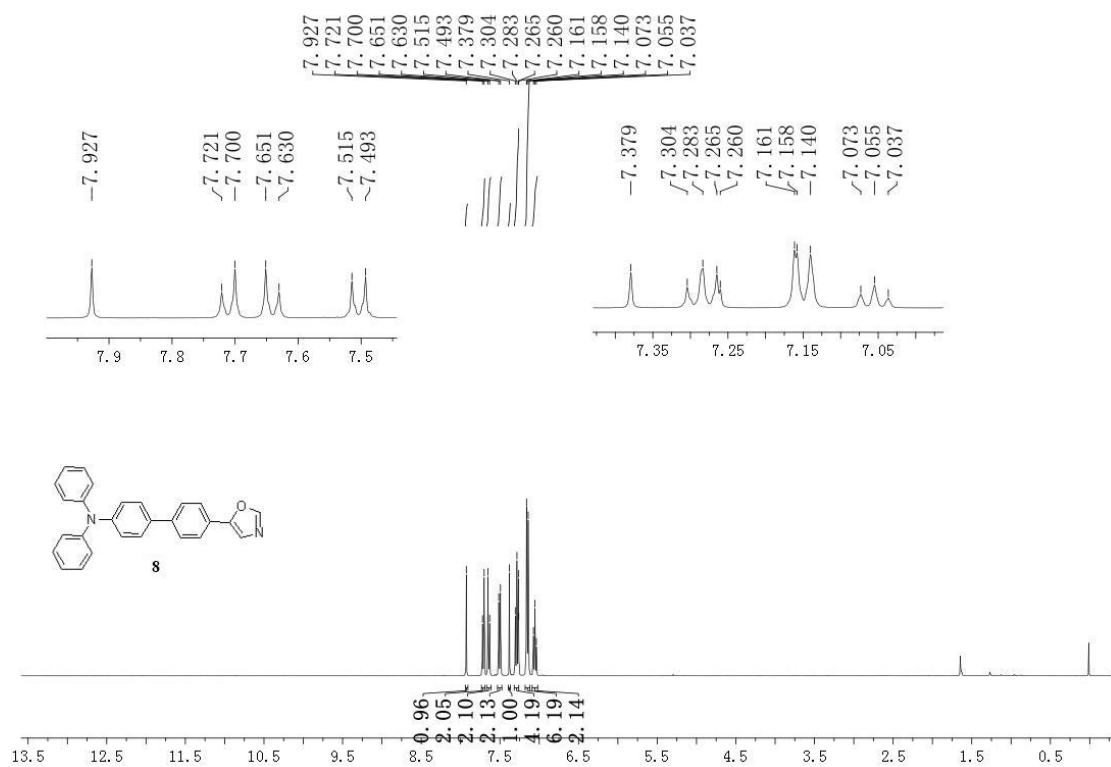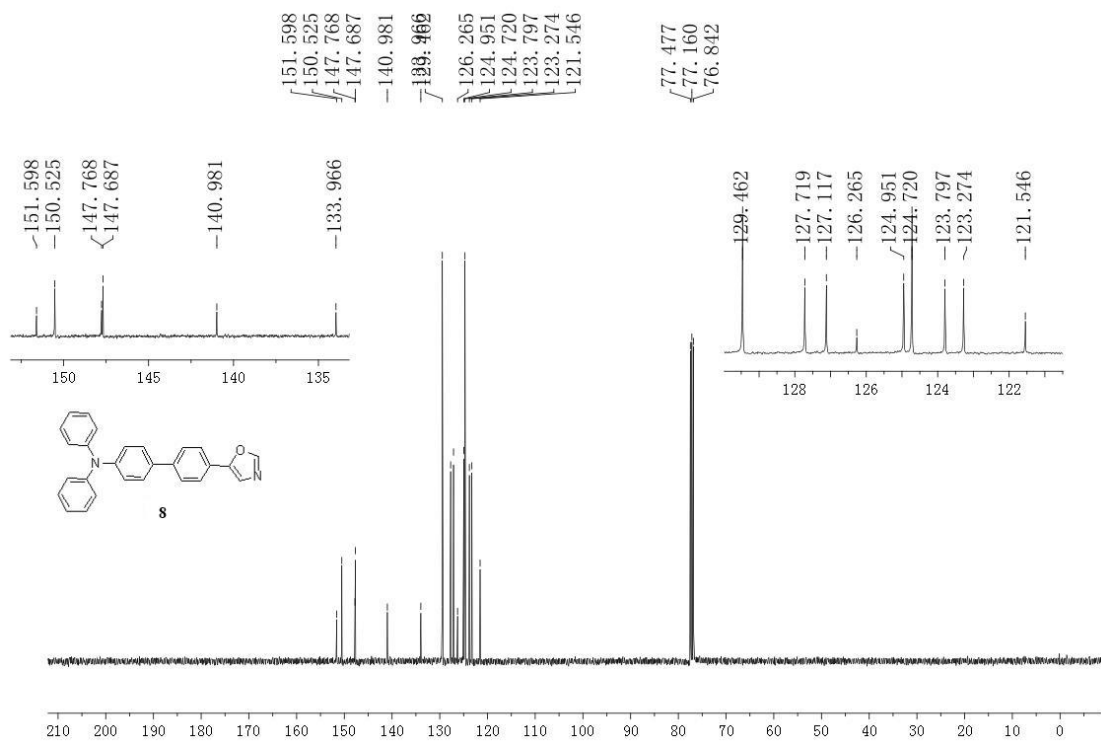

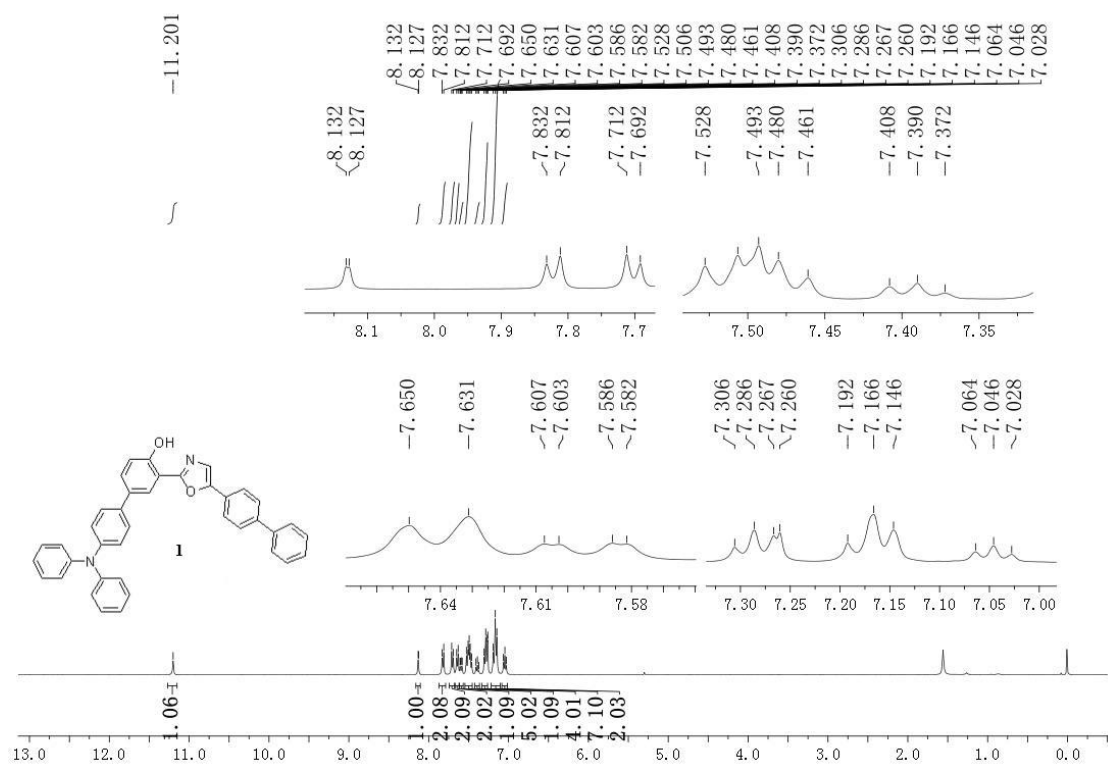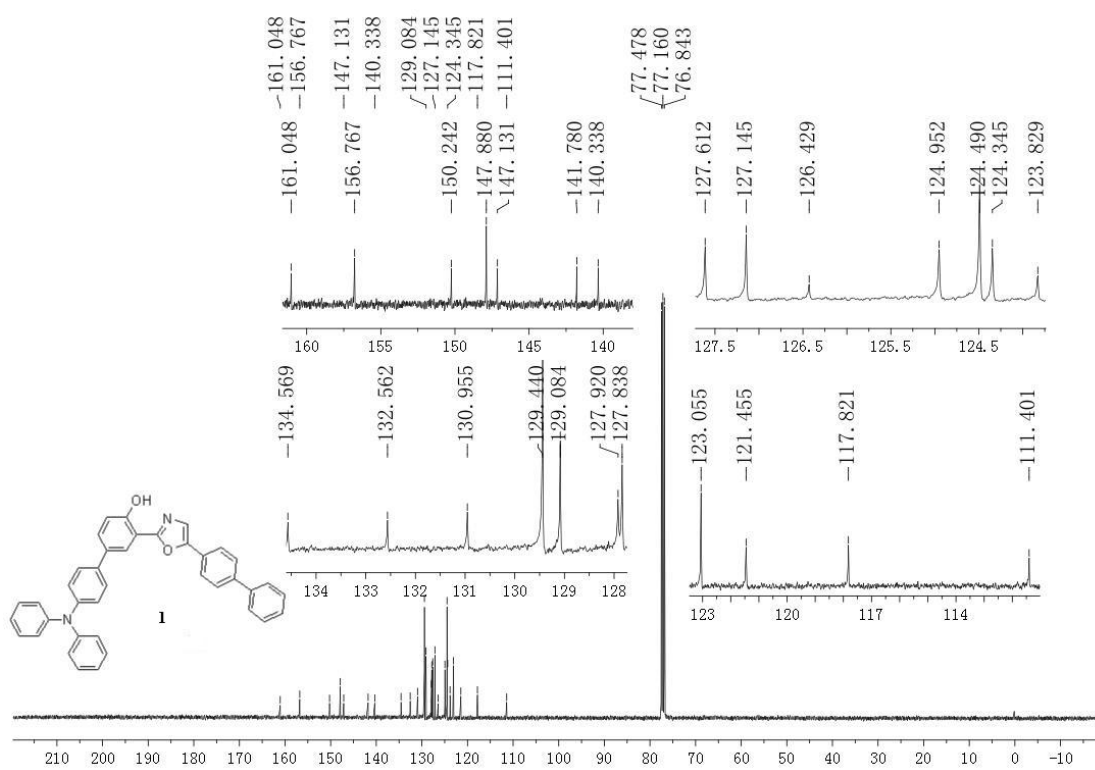

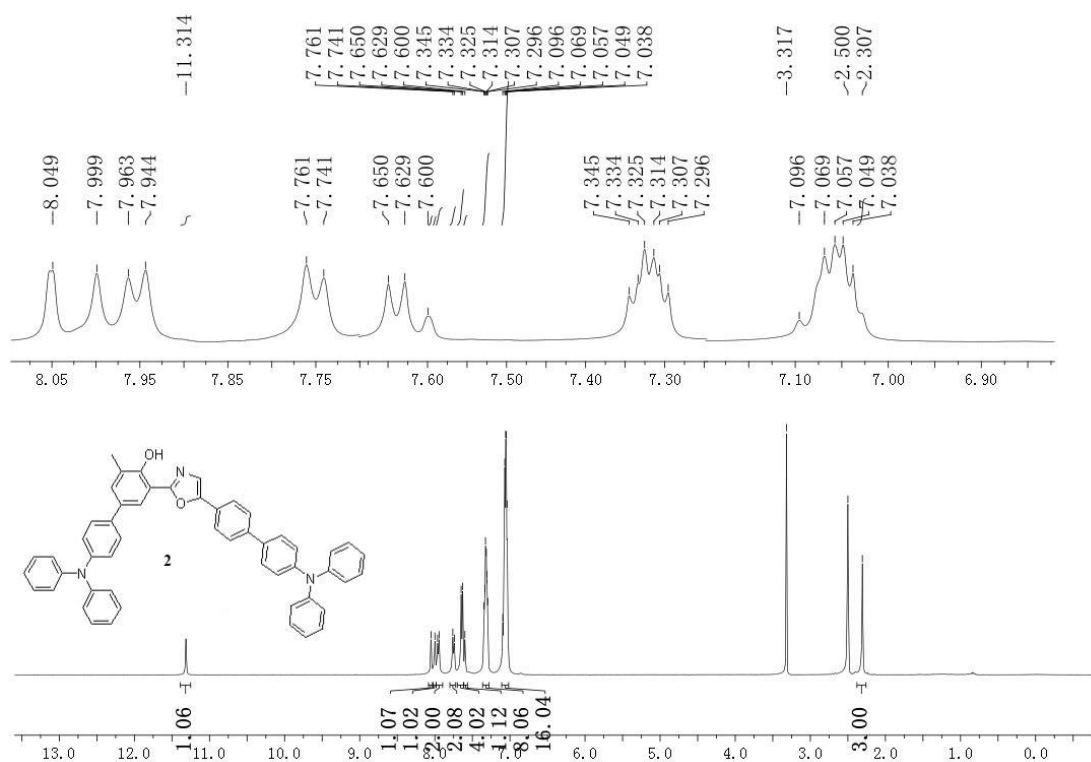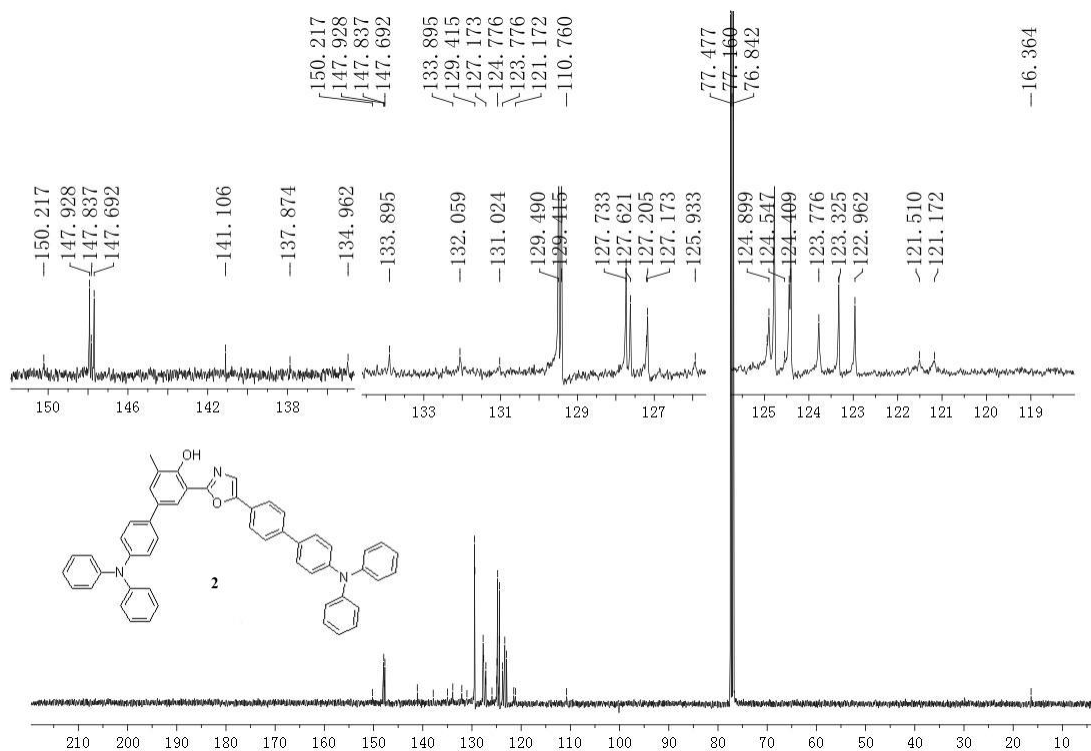

Supplement: Supplementary file 1 [file SC-009-C7SC04464J-s001.pdf]
